1 Regulation of lactose and galactose growth: Insights from a unique  
2 metabolic gene cluster in *Candida intermedia*

3

4 Kameshwara V. R. Peri<sup>1</sup>, Le Yuan<sup>1</sup>, Fábio Faria Oliveira<sup>1</sup>, Karl Persson<sup>1</sup>, Hanna D Alalam<sup>1</sup>,  
5 Lisbeth Olsson<sup>1 2</sup>, Johan Larsbrink<sup>1 2</sup>, Eduard J Kerkhoven<sup>1 3 4</sup> and Cecilia Geijer<sup>1</sup>

6 <sup>1</sup>Department of Life Sciences, Chalmers University of Technology, Gothenburg, Sweden.

7 <sup>2</sup>Wallenberg Wood Science Center, Chalmers University of Technology, 412 96, Gothenburg,  
8 Sweden.

9 <sup>3</sup>Novo Nordisk Foundation Center for Biosustainability, Technical University of Denmark,  
10 DK-2800 Kgs. Lyngby, Denmark.

11 <sup>4</sup>SciLifeLab, Chalmers University of Technology, 41296, Gothenburg, Sweden.

12 Corresponding author: [cecilia.geijer@chalmers.se](mailto:cecilia.geijer@chalmers.se)

13 **Keywords**

14 Cheese whey, metabolism, evolution, gene clusters, transcriptional regulation, galactose  
15 regulatory system, non-conventional yeast

## 16 Abstract

17 Lactose assimilation is a relatively rare trait in yeasts, and *Kluyveromyces* yeast species have  
18 long served as model organisms for studying lactose metabolism. Meanwhile, the metabolic  
19 strategies of most other lactose-assimilating yeasts remain unknown. In this work, we have  
20 elucidated the genetic determinants of the superior lactose-growing yeast *Candida intermedia*.  
21 Through genomic and transcriptomic analyses and deletion mutant phenotyping, we identified  
22 three interdependent gene clusters responsible for the metabolism of lactose and its hydrolysis  
23 product galactose: the conserved *LAC* cluster (*LAC12*, *LAC4*) for lactose uptake and hydrolysis,  
24 the conserved *GAL* cluster (*GAL1*, *GAL7*, *GAL10*) for galactose catabolism, and a unique  
25 “*GALLAC*” cluster. This novel *GALLAC* cluster, which has evolved through gene duplication  
26 and divergence, proved indispensable for *C. intermedia*'s growth on lactose and galactose. The  
27 cluster contains the transcriptional activator gene *LAC9*, second copies of *GAL1* and *GAL10*  
28 and the *XYL1* gene encoding an aldose reductase involved in carbon overflow metabolism.  
29 Notably, the regulatory network in *C. intermedia*, governed by Lac9 and Gal1 from the  
30 *GALLAC* cluster, differs significantly from the (ga)lactose regulons in *Saccharomyces*  
31 *cerevisiae*, *Kluyveromyces lactis* and *Candida albicans*. Moreover, although lactose and  
32 galactose metabolism are closely linked in *C. intermedia*, our results also point to important  
33 regulatory differences. This study paves the way to a better understanding of lactose and  
34 galactose metabolism in *C. intermedia* and provides new evolutionary insights into yeast  
35 metabolic pathways and regulatory networks. In extension, the results will facilitate future  
36 development and use of *C. intermedia* as a cell-factory for conversion of lactose-rich whey into  
37 value-added products.

38

39

40

41

42

43

44

## 45 Introduction

46 Assimilation of lactose is a rather uncommon characteristic among microorganisms, including  
47 yeasts. Growth screening of 332 genome-sequenced yeasts from the Ascomycota phylum  
48 showed that only 24 (<10%) could grow on lactose, and these lactose-utilizers are scattered  
49 throughout the phylogenetic tree<sup>1</sup>. While lactose increased in abundance on earth with the  
50 domestication of lactating mammals about 10,000 years ago<sup>2</sup>, ascomycetous yeast clades  
51 formed already millions of years ago<sup>1</sup>, suggesting that lactose metabolism may have evolved  
52 several times throughout yeast evolution. Whereas ‘dairy yeast’ from the *Kluyveromyces* genus,  
53 including *K. lactis* and *K. marxianus*, have been carefully characterized<sup>3-6</sup>, other lactose-  
54 metabolizing yeast species remain largely understudied. Elucidating the mechanisms behind  
55 their lactose metabolism can help to shed light on how eukaryotic metabolic pathways and the  
56 associated regulatory networks have evolved. Moreover, it can enable the development of new  
57 yeast species as cell factories for conversion of lactose in the abundant industrial side stream  
58 cheese whey into a range of different products<sup>7</sup>.

59 Lactose is a disaccharide composed of D-glucose and D-galactose connected through a  $\beta$ -1,4-  
60 glycosidic linkage. Its assimilation starts with the hydrolysis of lactose into its monosaccharides  
61 through the action of a lactase – normally an enzyme with  $\beta$ -galactosidase activity. Several  
62 different enzyme families encode lactases, which can be found intracellularly or extracellularly.  
63 In *Kluyveromyces* yeasts, lactose is transported across the plasma membrane by a *LAC12*-  
64 encoded lactose permease and is subsequently hydrolyzed intracellularly by a *LAC4*-encoded  
65  $\beta$ -galactosidase<sup>6</sup>. In contrast, the yeast *Moesziomyces aphidis* and *M. antarcticus* seem to show  
66  $\beta$ -galactosidase activity both intra and extracellularly, whereafter glucose and galactose are  
67 imported into the cell<sup>8</sup>. For most other lactose-growing yeast, comparative genomics and  
68 growth characterization are still needed to determine their lactose uptake and hydrolysis  
69 mechanisms.

70 In *Kluyveromyces* (and likely most other lactose-assimilating yeasts), lactose-derived glucose  
71 and galactose moieties are further catabolized through glycolysis and the Leloir pathway,  
72 respectively. The Leloir pathway is carried out by Gal1, Gal7 and Gal10, and starts by  
73 conversion of  $\beta$ -D-galactose into  $\alpha$ -D-galactose by the mutarotase domain of Gal10 (aldose-1-  
74 epimerase). Gal1 (galactokinase) then phosphorylates  $\alpha$ -D-galactose into  $\alpha$ -D-galactose-1-

75 phosphate, whereafter Gal7 (galactose-1-phosphate uridylyl transferase) transfers uridine  
76 diphosphate (UDP) from UDP- $\alpha$ -D-glucose-1-phosphate to  $\alpha$ -D-galactose-1-phosphate<sup>9</sup>. The  
77 epimerase (UDP-galactose-4-epimerase) domain of Gal10 catalyzes the final step, where UDP-  
78  $\alpha$ -D-galactose-1-phosphate is converted to UDP- $\alpha$ -D-glucose-1-phosphate<sup>10-12</sup>. In parallel to the  
79 Leloir pathway, some filamentous fungi such as *Trichoderma reesei* and *Aspergillus nidulans*  
80 have an alternative galactose catabolic pathway called the oxidoreductive pathway, where  
81 galactose is first converted into galactitol through the action of an aldose reductase<sup>11,12</sup>. Also a  
82 third galactose catabolic pathway, the DeLey-Doudoroff pathway, has been described to some  
83 detail<sup>12</sup>. To the best of our knowledge, (ga)lactose-growing yeasts described to date exclusively  
84 use the Leloir pathway, although some reports on galactose-to-galactitol conversion in  
85 *Rhodospiridium toruloides* and *Metschnikowia pulcherrima* exist<sup>13-15</sup>. Moreover, 12 out of 332  
86 ascomycetous yeasts have been shown to grow on galactitol<sup>1</sup>, indicating that they might possess  
87 an oxidoreductive pathway to catabolize this carbon source.

88 Comparative genomic studies have revealed that the *GALI*, 7 and 10 genes are often found  
89 located together in a “*GAL* cluster” in the genomes of yeast and filamentous fungi<sup>16</sup>, and also  
90 the *LAC4* and *LAC12* genes form a “*LAC* cluster” in for example *K. marxianus* and *K. lactis*<sup>6,16</sup>.  
91 Such metabolic gene clusters, identified both in filamentous fungi and yeasts, are particularly  
92 prevalent for pathways involved in sugar and nutrient acquisition, synthesis of vitamins and  
93 secondary metabolites<sup>17</sup>. Some clusters, including the *GAL* cluster, are conserved over a wide  
94 range of species whereas other clusters appear unique to one or a few species<sup>16,18,19</sup>. Like  
95 bacterial operons, the eukaryotic cluster genes are co-regulated in response to environmental  
96 changes, and clusters sometimes even encode their own transcriptional activators<sup>17</sup>. Clustering  
97 of genes under a common control mechanism allows the microorganism to rapidly adapt to  
98 environmental cues, which can be advantageous to avoid deleterious recombination events and  
99 high concentrations of local protein products. For example, co-regulation of the *GAL* genes is  
100 necessary to avoid accumulation of the toxic intermediate galactose-1-phosphate in the Leloir  
101 pathway<sup>16,20</sup>. Gene clusters can also propagate together by horizontal transfers to other species,  
102 which is less likely to occur for non-clustered genes<sup>21</sup>. In fact, selective pressures in lactose-  
103 rich environments in dairy farms led to the formation of an efficient lactose utilization system  
104 by rearrangement and horizontal gene transfer (HGT) of the *LAC* cluster genes in  
105 *Kluyveromyces* dairy strains<sup>6</sup>.

106 Regulation of galactose metabolism (and lactose where applicable) has been carefully  
107 characterized in yeasts such as *S. cerevisiae*, *K. lactis* and *Candida albicans*<sup>22-25</sup>, displaying  
108 both similarities and differences among species. In *S. cerevisiae*, three regulatory proteins  
109 (*ScGal4*, *ScGal80*, *ScGal3*) are responsible for galactose regulation. In the absence of galactose,  
110 the transcriptional activation domain of *ScGal4* is bound to the inhibitor *ScGal80*. In the  
111 presence of galactose, *ScGal3* relieves *ScGal4* from *ScGal80* in a galactose- and ATP-  
112 dependent manner, resulting in the induction of the *GAL* structural genes. Like for *S. cerevisiae*,  
113 *K. lactis* *GAL* regulatory system relies on relieving *KILac9* (ortholog of *ScGal4*) from *Gal80*  
114 inhibition. However, *K. lactis* lacks *Gal3* and instead uses a bifunctional galactokinase *KIGal1*  
115 to induce both galactose and lactose genes<sup>26</sup>. There are four *KILac9* binding sites in the *LAC*  
116 cluster gene promoters, which indicate the tight coregulation of lactose and galactose  
117 metabolism in this yeast<sup>27</sup>. Similar to *K. lactis*, *C. albicans* lacks *Gal3* but possesses a *Gal1* with  
118 both enzymatic and regulatory functions, but in this yeast the *GAL* gene expression is controlled  
119 by transcription factors *Rtg1/Rtg3*<sup>28</sup> and/or *CaRep1/CaCgal*<sup>29</sup> rather than *CaGal4*, which  
120 instead is responsible for expression of genes involved in glucose metabolism<sup>22</sup>. Such  
121 transcriptional rewiring is common among yeasts, which calls for coupling of comparative  
122 genomics with detailed mutant phenotyping and transcriptional analysis to decipher how  
123 regulation occurs in individual species.

124 While (ga)lactose metabolism in *S. cerevisiae* and *K. lactis* has long served as a model system  
125 for understanding the function, evolution and regulation of eukaryotic metabolic pathways, the  
126 corresponding knowledge regarding non-conventional yeasts is scarce. One such non-  
127 conventional yeast is *Candida intermedia*, a haploid yeast belonging to the *Metschnikowia*  
128 family in the CUG-Ser1 clade, which can grow on a wide range of different carbon sources<sup>1</sup>.  
129 *C. intermedia* has previously received attention as a fast-growing yeast on xylose. The xylose  
130 transporters and xylose reductases responsible for *C. intermedia*'s xylose-fermentative capacity  
131 have been characterized in several studies<sup>30-35</sup>. *C. intermedia* is one of very few yeasts in the  
132 *Metschnikowia* family that can grow on lactose<sup>1</sup>, and it has been used for cheese whey  
133 bioremediation in the past<sup>36</sup>. Our previous works on characterizing the in-house isolated *C.*  
134 *intermedia* strain CBS 141442 in terms of genomics, transcriptomics and physiology<sup>33,37,38</sup> and  
135 the development of a genome editing toolbox for this species<sup>39</sup> provide a stable platform for  
136 exploration of the genetic determinants of lactose metabolism in this yeast.

137 In this study, we show that *C. intermedia* possesses a unique ‘*GALLAC*’ cluster, in addition to  
138 the conserved *GAL* and *LAC* clusters, that is essential for growth on lactose and highly  
139 important for growth on galactose. Characterization of the individual genes within *GALLAC*  
140 cluster revealed differentiation in their functionality, enabling the yeast to regulate the  
141 expression of galactose and lactose genes differently. This cluster represents a new, interesting  
142 example of metabolic network rewiring in yeast, and likely helps to explain how *C. intermedia*  
143 has evolved into an efficient lactose-assimilating yeast.

## 144 Results

145 *C. intermedia* is among the top five lactose-growers out of 332 sequenced ascomycetous yeasts  
146 As a start, we wanted to assess the capacity of *C. intermedia* to grow on lactose compared to  
147 other yeasts. We cultured 24 of the 332 ascomycetous species that have scored positive for  
148 lactose growth<sup>1</sup>, as well as *C. intermedia* strains CBS 572 (type strain), CBS 141442 and PYCC  
149 4715 (previously characterized for utilization of xylose)<sup>1,34</sup>. The yeast species displayed  
150 different growth patterns in lag phase, doubling time and final biomass (Figure 1, Figure S1).  
151 When ranked based on lowest doubling time, *K. lactis* and *K. marxianus* were the fastest  
152 growers on lactose, closely followed by *C. intermedia* strains PYCC 4715 and CBS 141442,  
153 *Debaryomyces subglobulus* and *Blastobotrys muscicola* (Figure 1, Figure S1). Other species  
154 such as *Kluyveromyces aestuarii*, *Millerozyma acaciae* and *Lipomyces mesembris* showed poor  
155 or no growth under the conditions tested while others had very long lag phases. Thus, under the  
156 assessed conditions, our results establish *Candida intermedia* as one of the top five fastest  
157 lactose-growing species within this subset of ascomycetous yeasts<sup>1</sup>.

158 *Genomic and transcriptomic analysis identify three gene clusters involved in lactose and*  
159 *galactose assimilation.*

160 To identify the genetic determinants for lactose metabolism in *C. intermedia* CBS 141442, we  
161 searched the genome for orthologs of known genes involved in the uptake and conversion of  
162 lactose, and its tightly coupled hydrolysis-product, galactose. We found several genes encoding  
163 expected transcription factor orthologs including *LAC9*, *GAL4*, *RTG1*, *RTG3*, *REP1* and *CGAI*  
164 that have been associated with lactose and galactose metabolism in *K. lactis*<sup>40</sup>, *S. cerevisiae*<sup>41</sup>  
165 and *C. albicans*<sup>28,29</sup>. In accordance with previous reports for yeasts belonging to the genus

166 *Candida*<sup>10</sup>, we did not find orthologous of *GAL80*, strongly suggesting that *C. intermedia* does  
167 not possess the Gal3-Gal80-Gal4 regulon.

168 Moreover, genome of *C. intermedia* contains the conserved *GAL* cluster including *GAL1*, 7, 10  
169 genes as well as an *ORF-X* gene encoding a putative glucose-4,6-dehydratase similar to *GAL*  
170 clusters in *Candida/Schizosaccharomyces* strains<sup>10,16</sup> (Figure 2). We also identified the  
171 conserved *LAC* cluster containing the  $\beta$ -galactosidase gene *LAC4* and lactose permease gene  
172 *LAC12*<sup>3,4</sup>, which correlates well with *C. intermedia* predominantly displaying intracellular  $\beta$ -  
173 galactosidase activity (data not shown)<sup>6</sup>. To our surprise, *C. intermedia* also possesses a third  
174 cluster, hereafter referred to as the *GALLAC* cluster, containing a putative transcriptional  
175 regulator gene *LAC9* (*LAC9\_2*) next to a second copy of the *GAL1* gene (*GAL1\_2*), followed  
176 by one of the three xylose/aldose reductase genes (*XYLI\_2*) previously characterized in *C.*  
177 *intermedia*<sup>37</sup> and lastly, a second copy of *GAL10* (*GAL10\_2*). Interestingly, the *GAL10\_2* gene  
178 is shorter than *GAL10* in the *GAL* cluster and seems to encode only the epimerase domain,  
179 similar to *GAL10* orthologs in *Schizosaccharomyces* species and filamentous fungi<sup>10</sup>.

180 Next, we performed transcriptome analysis using RNA-sequencing (RNA-seq) technology on  
181 the CBS 141442 strain cultivated in media containing 2% of either lactose, galactose, or glucose  
182 (Figure 2). All genes in the *LAC* and *GAL* clusters were among the highest upregulated genes  
183 in both galactose and lactose as compared to glucose conditions. Also, the genes in the *GALLAC*  
184 cluster were highly upregulated on both of these carbon sources with respect to glucose, with  
185 the exception of the constitutively expressed *LAC9\_2* gene (Figure S2), indicating that the novel  
186 cluster might play an important role in galactose and lactose metabolism in this non-  
187 conventional yeast.

188 *The GALLAC cluster is essential for growth on lactose and unique to C. intermedia.*

189 To decipher the importance of the three clusters for (ga)lactose metabolism in *C. intermedia*,  
190 we deleted the clusters one by one using the split-marker technique previously developed for  
191 this yeast<sup>39</sup>. The cluster deletion mutants (*lac* $\Delta$ , *gal* $\Delta$  and *gallac* $\Delta$ ) grew almost as well as the  
192 wild-type strain (WT) in minimal media containing glucose (Figure 3A). As expected, *gal* $\Delta$   
193 failed to grow on galactose, which can be attributed to the complete shut-down of the Leloir  
194 pathway, whereas the *lac* $\Delta$  grew like WT. Interestingly, no growth was observed for the *gallac* $\Delta$   
195 in galactose during the first 90 h, whereafter it slowly started to grow (Figure 3B). With lactose

196 as carbon source, both *lacΔ* and *gallacΔ* completely failed to grow, whereas *galΔ* started to  
197 grow slowly after approx. 100 h (Figure 3C). Thus, our results show that the *GALLAC* cluster  
198 is essential for growth on lactose and highly important for growth on galactose.

199 To the best of our knowledge, the existence of a *GALLAC*-like cluster and its interdependence  
200 with the *GAL* and *LAC* clusters has never previously been reported. This, along with the severe  
201 growth defects of *gallacΔ*, encouraged us to determine the origin and prevalence of the cluster  
202 in other yeasts. First, we performed a comparative genomic analysis among the dataset of 332  
203 genome-sequenced ascomycetous yeasts<sup>1</sup>. Although *GAL1* and *GAL10* were found clustered  
204 together as parts of the conserved *GAL* clusters in 150/332 species<sup>16</sup>, *C. intermedia* was the  
205 only species where these genes also clustered with *LAC9* and *XYL1* genes (Figure 3D). Next,  
206 to decipher the evolutionary events that led to the formation of the *GALLAC* cluster, we  
207 generated phylogenetic trees for each individual gene product of the cluster. Our analysis  
208 revealed that although the amino acid identities between the paralogs in *C. intermedia* are  
209 relatively low (56% for Gal1 and Gal1\_2, 72% for Gal10 and Gal10\_2, 49% for Lac9\_2 and  
210 Lac9 and 66% and 62% for Xyl1\_2 compared to Xyl1 and Xyl1\_3, respectively), the identities  
211 between the paralogs are still higher than for most orthologs in other species (Figure 3B, Figure  
212 S 3-6). Combined, these results strongly suggest that the unique *GALLAC* cluster has evolved  
213 within *C. intermedia* through gene duplication and divergence.

#### 214 *Deletion of individual genes in the GAL and GALLAC clusters reveals importance of Lac9\_2* 215 *and Gal1\_2 for (ga)lactose metabolism.*

216 To elucidate the physiological function of genes situated in the *GALLAC* cluster and to better  
217 understand the interdependence between the clusters, we deleted individual genes in both the  
218 *GALLAC* and *GAL* clusters. The mutant phenotypes were compared with WT and complete  
219 cluster deletions regarding growth, consumption of sugars and production of metabolites in  
220 defined media containing either 2% galactose or lactose.

221 With galactose as carbon source, deletion of *LAC9\_2* located in the *GALLAC* cluster resulted  
222 in an extended lag phase accompanied by galactitol production, indicating that this putative  
223 transcription factor is involved in regulation of galactose metabolism. However, deletion of the  
224 other genes in the *GALLAC* cluster did not result in severe growth defects (Figure S 7). For  
225 mutants deleted of individual *GAL* cluster genes, we saw the expected severe growth defects



226 for *gal1Δ*, *gal7Δ* and *gal10Δ* (Figure 4A). However, *gal10Δ* repeatedly displayed some growth  
227 after a very long lag phase of approx. 250h (Figure S 8), which could suggest that *Gal10\_2*  
228 from the *GALLAC* cluster can partly complement the deletion of *GAL10* from the *GAL* cluster.

229 With lactose as carbon source, *lac9\_2* displayed a delay in the onset of growth as was observed  
230 for galactose while *gal10\_2Δ* and *xyll\_2Δ* grew like WT. However, in contrast to the galactose  
231 case, deletion of *GALI\_2* abolished growth and resembled the deletion of the whole *GALLAC*  
232 cluster, indicating an important function for this protein in lactose metabolism and a clear  
233 phenotypic difference between the two carbon sources. On the contrary, deletion of *GALI* from  
234 the *GAL* cluster did not fully abolish growth on lactose, but growth was slower and  
235 accompanied with accumulation of galactitol (73% of theoretical yield), suggesting that most  
236 of the lactose-derived galactose is catabolized through the action of an aldose reductase (such  
237 as *Xyl1\_2*), rather than through the putative galactokinase *Gal1\_2* in this mutant. Also, *gal10Δ*  
238 grew slowly but with no measurable accumulation of galactose or galactitol, again showing that  
239 the *GAL10\_2* in the *GALLAC* cluster can partly complement this deletion. Deletion of the only  
240 copy of *GAL7* gene encoding for galactose-1-phosphate uridylyltransferase resulted in  
241 complete growth inhibition on lactose (as for galactose), and we speculate that the severe  
242 growth phenotype is due to the accumulation of toxic intermediate galactose-1-phosphate as  
243 seen in *S. cerevisiae* in previous studies<sup>20</sup>.

244 As no single deletion resembled the growth defect seen for *gallacΔ* on galactose, we  
245 hypothesized that two or more genes must be deleted for the same phenotype to appear. We  
246 therefore deleted both *LAC9\_2* and *GALI\_2*, which resulted in a growth defect strikingly  
247 similar to that of the complete *GALLAC* cluster mutant (Figure S 9). Overall, we can conclude  
248 that *Lac9\_2* and *gali\_2* have important functions during galactose and lactose growth, although  
249 there seem to be significant differences between the two carbon sources.

250 *Lac9 binding motifs are found in promoters in the GALLAC cluster but not in the GAL and LAC*  
251 *clusters.*

252 To better understand the putative role of *Lac9\_2* as a transcriptional regulator, we performed  
253 Multiple Em for Motif Elicitation<sup>42</sup> (MEME; Version 5.5.43) analysis to identify conserved  
254 transcription factor binding motifs in gene promoters in the three clusters. The analysis revealed  
255 *Lac9* (*Gal4*) binding motifs (p-value =  $8.66 \times 10^{-3}$ ) in the promoters of *GALI\_2*, *XYLI\_2* and

256 *GAL10\_2* in the *GALLAC* cluster, but not in the promoters in the *GAL* and *LAC* clusters (Figure  
257 5A, Figure S 10). These results confirm the bioinformatic analysis of the 332 ascomycetous  
258 yeast recently published, showing that *C. intermedia* and many other CTG clade yeasts lack  
259 Lac9/Gal4 binding sites in their *GAL* clusters<sup>16</sup>. Although additional analysis would be needed  
260 to better understand the transcriptional regulation exerted by Lac9\_2, it is likely that it directly  
261 binds the promoters of genes within the *GALLAC* cluster.

262 Besides *LAC9\_2* in the *GALLAC* cluster, our comparative genomics analysis also identified a  
263 second, non-clustered *LAC9* gene (Figure 3) as well as *GAL4* gene. All three proteins have  
264 predicted Gal4-like DNA-binding domains, but they differ substantially in protein sequence  
265 identity (45% for Lac9\_2 and Lac9, and 18% and 19% for Gal4 compared to Lac9 and Lac9\_2,  
266 respectively). As deletion mutants of *LAC9* and *GAL4* did not display growth defects on lactose  
267 or galactose (Figure S 11), we conclude that they are not important transcriptional regulators  
268 for (ga)lactose metabolism in *C. intermedia*.

#### 269 *Gall\_2 is required for the induction of LAC cluster genes in C. intermedia*

270 Our deletion mutant phenotyping results suggest that Gall and Gall\_2 have at least partly  
271 different physiological functions in *C. intermedia* (Figure 4). As both genes are highly  
272 upregulated on both galactose and lactose in the WT strain (Figure 2), we speculated that they  
273 must differ in their activities as galactokinases or regulators. To this end, we expressed both  
274 proteins in *S. cerevisiae* BY4741 *gall1Δ*, which successfully rescued the mutant's growth defect  
275 on galactose (Figure 6A). This experiment demonstrates that both proteins have galactokinase  
276 activity, at least when expressed in *S. cerevisiae*. We also compared the predicted structures of  
277 Gall and Gall\_2 using Alphafold2<sup>43,44</sup>, observing that even though the amino acid sequence  
278 identity between the two proteins is as low as 56%, the protein structures are very similar to  
279 each other (rmsd 0.490 Å; Figure 6B) as well as to the experimentally solved structure of  
280 *ScGall*<sup>42</sup> (rmsd 0.778 and 0.758 Å for Gall and Gall\_2, respectively). Additionally, we  
281 observed that the amino acids interacting with galactose in *ScGall* (PDB ID: 2aj4) are identical  
282 to those in the *CiGall* proteins, apart from Asn213 in *ScGall* (Asn205 in *CiGall*), which  
283 interacts with the O2 hydroxyl group, which in *CiGall\_2* is instead a serine residue (Ser199).  
284 The active site clefts of all enzymes are only big enough to accommodate monosaccharides like  
285 galactose. Thus, it is highly unlikely that they bind to other, larger substrates such as lactose  
286 (Figure 6B). In *S. cerevisiae*, the regulator *ScGal3* is similar in structure to the galactokinase

287 *ScGal1* but has lost its galactokinase activity due to an addition of two extra amino acids (Ser-  
288 Ala dipeptide)<sup>45</sup>. However, no such structural changes were seen for *CiGal1* or *CiGal1\_2* that  
289 could help us to predict regulatory functions.

290 Instead, we examined the role of *Gal1* and *Gal1\_2* as regulators of lactose metabolism by  
291 performing  $\beta$ -galactosidase assays with *C. intermedia gall1 $\Delta$* , *gall\_2 $\Delta$*  as well as WT (positive  
292 control) and *lac $\Delta$*  (negative control). Our RNAseq data showed that in WT, *LAC4* is expressed  
293 during growth on both galactose and lactose, respectively (Figure 2). Thus, we assessed the  
294 lactase activity during growth on both these sugars to include at least one condition where all  
295 strains could grow. For both galactose and lactose, lactase activity was readily detected in WT  
296 and *gall1 $\Delta$*  cells but close to zero in the *lac $\Delta$*  and *gall\_2 $\Delta$*  mutants (Figure 6C), showing that  
297 *Gal1\_2* is essential to induce lactase activity. Moreover, qPCR analysis of WT and *gall\_2 $\Delta$*   
298 showed that *LAC4* expression was diminished in *gall\_2 $\Delta$*  as compared to the WT, indicating  
299 that regulation is exerted on the transcriptional level. In the same mutant we also observed that  
300 *GALI* was still expressed (Figure 6D), fortifying the growth phenotyping results where we saw  
301 a clear difference in growth on galactose (+) and lactose (-) for this single mutant. Overall, these  
302 results firmly establish a difference in function between *Gal1* and *Gal1\_2*, where lack of *Gal1\_2*  
303 diminishes lactase transcription and activity while *Gal1* does not, and further indicate important  
304 differences in regulation of lactose and galactose metabolism and growth.

## 305 Discussion

306 In this work we have investigated how (ga)lactose is metabolized in the non-conventional yeast  
307 *C. intermedia* and shed light on the genetic determinants behind this trait. Interestingly, we  
308 found that the genome of *C. intermedia* contains not only the conserved *GAL* and *LAC* clusters,  
309 but also a unique *GALLAC* cluster that has evolved through gene duplication and divergence.  
310 By combining results from comparative genomics, transcriptomics analysis, deletion mutant  
311 phenotyping and metabolite profiling, we have started to unravel parts of the regulatory  
312 networks and interdependence of the three clusters and can show that the *GALLAC* cluster plays  
313 a vital role in both galactose and lactose metabolism in this yeast. With the Leloir pathway of  
314 budding yeasts acting like a model system for understanding the function, evolution and  
315 regulation of eukaryotic metabolic pathways, this work adds interesting new pieces to the  
316 puzzle.

317 Our results show that *C. intermedia* grows relatively fast on lactose, and strains of this species  
318 have been isolated several times from lactose-rich niches including fermentation products like  
319 white-brined cheese<sup>46</sup> and cheese whey<sup>47</sup>. In these lactose-rich environments, survival likely  
320 necessitates a genetic makeup that can help outcompete rivaling microorganisms. Is the  
321 *GALLAC* cluster facilitating the fast lactose growth observed for *C. intermedia*, and if so, how?  
322 This is currently unresolved, but the genes within the cluster and the mutant phenotyping results  
323 provide some clues. First, the *GALLAC* cluster seems to have important regulatory functions,  
324 which can help to finetune metabolic fluxes and growth. We demonstrate that the cluster-  
325 encoded transcription factor Lac9\_2 is important for onset of (ga)lactose growth, as deletion of  
326 *LAC9\_2* leads to increased lag phase on both carbon sources. However, as *lac9\_2Δ* cells  
327 eventually grow, Lac9\_2 cannot be solely responsible for expression of the metabolic genes.  
328 Moreover, Lac9 binding motifs were only found in the promoters of *GALLAC* genes, suggesting  
329 that other transcriptional activators are responsible for induction of the *GAL* and *LAC* cluster  
330 genes.

331 In addition to Lac9\_2, Gal1\_2 from the *GALLAC* cluster also seems to be an important regulator  
332 of (ga)lactose growth. The bioinformatic analysis strongly suggests that *GALI\_2* in *C.*  
333 *intermedia* formed through gene duplication and divergence from the *GALI* gene in the *GAL*  
334 cluster. Our results also show that Gal1\_2 is essential for *LAC4* transcription and in extension,  
335 lactase activity and lactose growth, whereas deletion of *GALI\_2* alone did not abolish *GALI*  
336 expression and galactose growth. Combined, these results indicate that the original Gal1 seems  
337 to have maintained the function as main galactokinase while Gal1\_2 has taken on the role as a  
338 regulator. This evolutionary trajectory mirrors the path taken by Gal1 and Gal3 in *S.*  
339 *cerevisiae*<sup>45</sup>, but with a crucial distinction: the Gal1 proteins in *C. intermedia* have evolved in  
340 response to both lactose and galactose. On galactose, an additional deletion of *LAC9\_2* was  
341 needed to impair growth, suggesting that the yeast senses and regulates expression of the  
342 galactose and lactose genes somewhat differently. Since Gal1\_2 does not have a DNA binding  
343 capacity, we hypothesize that Gal1\_2 binds galactose and thereafter activates unknown  
344 transcription factor(s) that ultimately bind and induce expression from the *LAC* and *GAL*  
345 clusters. Although many details are still to be elucidated, it is clear that *C. intermedia* has  
346 developed a way of regulating its (ga)lactose metabolism that differs from other yeast species  
347 studied to date, including the Gal3-Gal80-Gal4 regulon in *S. cerevisiae*<sup>48</sup>, the Gal1-Gal80-Lac9

348 equivalent in *K. lactis*<sup>40</sup> and the Rep1-Cgal regulatory complex in *C. albicans*<sup>29</sup>. Future research  
349 will include identifying these unknown TFs and fully elucidating the roles of Lac9\_2 and  
350 Gal1\_2 in sensing, signaling, and regulating the cellular response to changes in the nutritional  
351 environment.

352 Another interesting feature of the *GALLAC* cluster is the *XYLI\_2* gene encoding an aldose  
353 reductase. Although no galactitol or other intermediates of an oxidoreductive pathway  
354 accumulate in the WT under the growth conditions assessed, several of the constructed mutants  
355 (in particular, *galΔ* and *gal1Δ*) accumulate galactitol upon growth on lactose. In *S. cerevisiae*,  
356 galactitol functions as an overflow metabolite ensuring that cells avoid accumulation of  
357 galactose-1-phosphate, a known toxic intermediate of the Leloir pathway in the cell<sup>15,20</sup>, and it  
358 is reasonable to assume that the same is true for *C. intermedia*. Moreover, it is interesting to  
359 note that aldose reductases can directly convert  $\beta$ -D-galactose, the hydrolysis product of lactose,  
360 whereas galactokinase requires  $\beta$ -D-galactose conversion into  $\alpha$ -D-galactose before it can be  
361 metabolized via the Leloir pathway. We speculate that induction of an aldose reductase gene in  
362 tandem with the *LAC* and *GAL* genes in response to lactose (and galactose) can be an efficient  
363 way to quickly metabolize these sugars, providing a growth advantage in competitive lactose-  
364 rich environments.

365 In addition to the basic scientific questions that can be answered by studying evolution and  
366 sugar metabolism in lactose-growing yeast species, these yeasts can also be used as cell  
367 factories in industrial biotechnology processes. Here, a better understanding of the underlying  
368 genetics for this trait enables metabolic engineering to optimize the conversion of lactose-rich  
369 whey into value-added products. The dairy yeasts *K. lactis* and *K. marxianus* have been  
370 developed and used for whey-based production of ethanol<sup>49</sup>, recombinant proteins<sup>50</sup> as well as  
371 bulk chemicals such as ethyl acetate<sup>51</sup>, while exploration of new lactose-metabolizing yeasts  
372 allows for additional product diversification. With lactose as substrate, a carbon-partition  
373 strategy can be used for bioproduction, where the glucose moiety is converted into energy and  
374 yeast biomass and the galactose moiety is steered into production of the wanted metabolite, or  
375 vice versa<sup>13</sup>. Through this strategy, the non-conventional yeast *C. intermedia* can also be  
376 explored to produce various growth-coupled metabolites, including galactitol and derivatives  
377 thereof.

378 In conclusion, our work on the non-conventional, lactose-metabolizing yeast *C. intermedia* has  
379 paved the way towards a better understanding of the (ga)lactose metabolism in this relatively  
380 under-studied species. To the best of our knowledge, we show for the first time that gene  
381 duplication and divergence resulted in the formation of a unique *GALLAC* cluster and its  
382 essential role in (ga)lactose metabolism in this yeast, providing new insights of how organisms  
383 can evolve metabolic pathways and regulatory networks. In addition, the proven ability of *C.*  
384 *intermedia* to grow relatively well on lactose establishes this yeast as an interesting lactose-  
385 assimilating species also for future industrial applications.

## 386 Materials and Methods

### 387 *Culture conditions and molecular techniques*

388 For amplification of plasmids, *E. coli* was grown on LB medium (1 % tryptone, 1 % NaCl and  
389 0.5 % yeast extract) containing ampicillin (100 µg/mL) for plasmid selection.

390 *C. intermedia* CBS 141442 was grown in YPD medium (1% yeast extract, 2% bactopectone  
391 and 2% glucose) prior to yeast transformation using the split marker technique as described  
392 previously<sup>39</sup>. Using this technique, deletion cassettes were constructed as two partially  
393 overlapping fragments, each containing half of the selection marker fused to either upstream or  
394 downstream sequences of the target gene. Deletion fragments were transformed using  
395 electroporation (BioRad Micropulse electroporator). After transformation, cells were plated on  
396 YPD agar containing 200 µg/ml nourseothricin to select for integration and expression of the  
397 *CaNATI* selection marker.

398 Colony PCR was used to identify transformants with correct gene deletions, where single  
399 colonies were resuspended in 50 µL dH<sub>2</sub>O using a sterile toothpick and then heated to 90 °C for  
400 10 min. After cooling to 12 °C, 2 µL of each suspension was used as a template for PCR using  
401 PHIRE II polymerase (Thermo-Fisher Scientific, USA). For each mutant, three PRC primers  
402 were used, where the first primer was designed to hybridize to the genome outside the flanking  
403 region, the second to the marker gene and the third to the targeted gene (negative control). For  
404 each gene deletion, three correctly targeted transformants were selected for subsequent  
405 phenotyping.

406 To construct the double gene deletion mutant (*lac9\_2*, the split marker method was used twice  
407 in the same strain background, first employing the split *CaNATI* selection marker as described  
408 above, and then a split KanMX selection marker PCR amplified from the plasmid  
409 pTO149\_RFP\_CauNEO developed for *Candida auris*<sup>52</sup>. Correctly assembled and genome  
410 integrated KanMX markers gave rise to *C. intermedia* transformants resistant to the antibiotic  
411 Geneticin (200 µg/mL).

412 For complementation tests in *S. cerevisiae*, *C. intermedia* *GALI* and *GALI\_2* genes were  
413 synthesized and cloned in a vector backbone (pESC-URA; GenScript Biotech, New Jersey,  
414 USA). Codon CTG were adjusted to alternate codon prior to optimization of the complete gene  
415 for expression in *S. cerevisiae* using the GenSmart™ Codon Optimization tool (GenScript  
416 Biotech, New Jersey, USA). *S. cerevisiae* BY4741/2 *GALI* knockouts used for  
417 complementation experiment were grown on YP media with 2% glucose and transformed with  
418 above mentioned plasmids using LiAc/PEG heat-shock method<sup>53</sup>. Transformants were selected  
419 on agar plates with YNB -uracil and 2% glucose, restreaked and then tested for growth in liquid  
420 YNB -URA media with 2% galactose in GrowthProfiler at 30 °C and 250 rpm. *S. cerevisiae*  
421 BY4741/2 *gallA* transformed with p426 (empty vector with *URA3* as selection marker) was  
422 used as negative control.

### 423 *Growth Experiments*

#### 424 *Growth Profiler*

425 To follow growth over time for *C. intermedia* CBS 141442 and the other yeasts characterized  
426 in this work, strains were precultured at 30 °C, 180 rpm overnight in synthetic defined minimal  
427 Verduyn media<sup>54</sup> containing 2% glucose (w/v). Precultured cells were then inoculated in  
428 250 µL minimal media supplemented with 20 g/L carbon source to a starting OD<sub>600</sub> = 0.1. All  
429 yeast strains were grown in biological triplicates in a 96-well plate setup in a GrowthProfiler  
430 960 (EnzyScreen, Netherlands). ‘Green Values’ (GV) measured by the GrowthProfiler  
431 correspond to growth based on pixel counts, and GV changes were recorded every 30 min for  
432 72 h at 30 °C and 150 rpm.

#### 433 *Cell growth quantifier (CGQ)*

434 Growth characterization was also performed in shake flasks using Cell Growth Quantifier  
435 (CGQ-Scientific Bioprocessing, Germany)<sup>55</sup>. Wild type and mutant strains were precultured at

436 30 °C, 200 rpm overnight in synthetic defined minimal Verduyn media containing 2% glucose  
437 (w/v), followed by inoculation of 25ml of minimal medium supplemented with 2% carbon  
438 source (galactose or lactose) in 100mL shake flasks to a starting  $OD_{600} = 0.1$ . Growth was  
439 quantified as “Scatter values” by the CGQ system<sup>56</sup>. Scatter values were recorded for 10 days  
440 at 30 °C and 200 rpm for each strain growth in biological triplicates and sampling was  
441 performed for sugar and polyol analysis.

#### 442 *Lactase activity assay*

443  $\beta$ -galactosidase activity was determined using the Yeast  $\beta$ -Galactosidase Assay Kit (Thermo-  
444 Fisher Scientific, USA) following the manufacturer’s instructions. Cells were harvested at  
445 different timepoints during growth and tested for lactase activity. A Working solution was  
446 prepared by mixing equal amounts of 2X  $\beta$ -galactosidase Assay Buffer (containing ortho-  
447 nitrophenyl- $\beta$ -galactoside (ONPG)) and Yeast Protein Extraction Reagent. The reaction was  
448 initiated by mixing 100uL of working solution with 100uL cell culture and incubated for 30  
449 min at 37 °C in a thermomixer. After 30 min, cell mix was centrifuged at 5000 rpm for 3 mins  
450 and the supernatant was analyzed for lactase activity by measuring o-nitrophenol release from  
451 ONPG at 420 nm in microplate reader (FLU-Ostar Omega-BMG LabTech, Ortenberg,  
452 Germany).

#### 453 *Determination of sugar and polyol concentrations*

454 Sugars and galactitol concentrations were measured using a Dionex high-performance liquid  
455 chromatography (HPLC) system equipped with an RID-10A refractive index detector and an  
456 Aminex HPX-87H carbohydrate analysis column (Bio-Rad Laboratories). Analysis was  
457 performed with the column at 80 °C, and 5 mM  $H_2SO_4$  as mobile phase at a constant flow rate  
458 of 0.8 mL/min. Culture samples were pelleted prior to analysis, following which, the  
459 supernatant was passed through a 0.22  $\mu$ m polyether sulfone syringe filter. Chromatogram  
460 peaks were identified and integrated using the Chromeleon v6.8 (Dionex) software and  
461 quantified against prepared analytical standards.

#### 462 *Comparative genomics and evolutionary mapping*

463 We established the blast database for 332 yeast species based on the work of Shen et al., 2018<sup>1</sup>.  
464 Then we used tblastn to get gene hits for each specific gene in three clusters against 332 yeast  
465 species. Based on the generated data, we further mapped gene hits from species to clade levels.



466 To investigate the evolution of genes in the *GALLAC* cluster, a comprehensive pipeline based  
467 on the work of Goncalves and colleagues was developed<sup>57</sup>. For each candidate gene in the  
468 *GALLAC* cluster, BLASTP was run against the NCBI non-redundant (nr) protein sequence  
469 database and homologs were selected according to the top 300 BLAST hits to each query  
470 sequence. These homologs were aligned with MAFFT v7.310<sup>58</sup> using default settings for  
471 multiple sequence alignment. Poorly aligned regions were removed with trimAl<sup>59</sup> using the  
472 ‘-automated1’ option. Subsequently, phylogenetic trees were built using IQ-TREE v1.6.12  
473 <sup>60</sup> with 1000 ultrafast bootstrapping replicates<sup>61</sup>. Each tree was rooted at the midpoint using a  
474 customized script combining R packages ape v5.4-1 and phangorn v2.5.5. Finally,  
475 the resulting phylogenies were visualized using iTol v5<sup>62</sup>.

#### 476 *Transcription factor binding motif analysis*

477 To determine the binding motifs of transcription factors in promoter regions of the *GAL*, *LAC*  
478 and *GALLAC* cluster, MEME (Version 5.5.43) promoter binding motif analysis was used.  
479 Promoter regions of all genes from the three clusters were added as query sequences with the  
480 following constraints: maximum number of motifs = 5, maximum length of motif = 25 bases,  
481 any number of motif repetitions (-anr), background model = 0-order model of sequences.  
482 Motif(s) derived from this analysis were then fed as input to Tomtom<sup>63</sup> (version 5.5.4) to  
483 compare against Yeabstract<sup>64</sup> database.

#### 484 *RNA sequencing*

485 Transcriptomics using RNA sequencing was performed as previously described<sup>37</sup>. In brief, *C.*  
486 *intermedia* CBS 141442 was grown in controlled stirred 1-L bioreactor vessels (DASGIP,  
487 Eppendorf, Hamburg, Germany) containing 500 mL synthetic defined minimal Verduyn media  
488 with 2% Glucose, Galactose or Lactose. Reactor conditions were maintained as: Temp = 30 °C;  
489 pH = 5.5 (maintained with 2M Potassium Hydroxide); Aeration = 1 Vessel Volume per Minute;  
490 stirring = 300 rpm.

#### 491 *RNA extraction*

492 For RNA extraction, samples (10 mL) were collected when the dissolved oxygen of the culture  
493 was 35–40% (v/v). After washing the cells, the pellets were immediately frozen using liquid  
494 nitrogen. Frozen pellets were stored at -80 °C until extraction. The frozen pellets were thawed  
495 in 500 µL of TRIzol (Ambion—Foster City, CA, USA) and thoroughly resuspended. Then,

496 cells were lysed in 2 mL tubes with Lysing Matrix C (MP Biomedical, Santa Ana, CA, USA)  
497 in a FastPrep FP120 (Savant, Carlsbad, CA, USA) for five cycles, at intensity 5.5 for 30 s.  
498 Tubes were cooled on ice for a minute between cycles and resuspended once again in 500  $\mu$ L  
499 of TRIzol and vortexed thoroughly. After incubation at room temperature for 5 min, tubes were  
500 centrifuged for 10 min at 12,000 rpm and 4 °C. Chloroform was added to the collected  
501 supernatants (200  $\mu$ L of chloroform per mL of supernatant) and vortexed vigorously for 30 s.  
502 After centrifugation for 15 min at 12,000 rpm, 4 °C, the top clear aqueous phase was collected  
503 and transferred to a new RNase-free tube, to which, equal amount of absolute ethanol was  
504 slowly added while mixing. Each sample was loaded into a RNeasy column (RNeasy Mini Kit,  
505 Qiagen—Hilden, Germany) and further steps followed the protocol of the manufacturer. The  
506 RNA was eluted with RNase-free water and samples were stored at -80 °C until use.

#### 507 Data analysis

508 RNA samples were analyzed in a TapeStation (Agilent, Santa Clara, CA, USA), and only  
509 samples with RNA integrity number above 8 were used for library preparation. Sequencing  
510 using the HiSeq 2500 system (Illumina Inc.—San Diego, CA, USA), with paired-end 125 bp  
511 read length, and v4 sequencing chemistry, was followed by quality control of read data using  
512 the software FastQC version 0.11.5<sup>65</sup>. Software Star version 2.5.2b<sup>66</sup> was used to map reads to  
513 the reference genome. Gene counts were normalized with weighted trimmed mean of M-values  
514 using the calcNormFactor function from the package edgeR<sup>67</sup> and Limma package<sup>68</sup> were used  
515 to transform and make data suitable for linear modelling. The estimated p-values were corrected  
516 for multiple testing with the Benjamini-Hochberg procedure, and genes were considered  
517 significant if the adjusted p-values were lower than 0.05. The raw counts were filtered such that  
518 genes with CPM > 3.84 in at least 12% (5/43) of the samples were retained. The R function  
519 ‘varianceStabilizingTransformation()’ from R package ‘DESeq2’<sup>69</sup> was used to convert raw  
520 counts to variance-stabilized-counts (VST). Expression data for *C. intermedia* on galactose and  
521 lactose was normalized using glucose as control condition. The RNA seq datasets are available  
522 in the European Nucleotide Archive (ENA) with the accession number E-MTAB-6670.

523

## 524 *Gene expression analysis using qPCR*

525 Primers used for mRNA quantification using qPCR are listed in Table S1. Primers were  
526 designed using Primer3 (<https://primer3.ut.ee/>) and were checked for efficiency. Only primers  
527 having efficiency between 90-110% were used for qPCR. Cultures were grown at 30 °C and  
528 200 rpm in 100 ml shake flasks containing 25 ml synthetic defined minimal Verduyn media  
529 containing either 2% glucose (control), galactose or lactose as carbon source. Cells were  
530 harvested for each strain at lag, early log and late log phases, taking three biological replicates.  
531 Harvested cells were pelleted by centrifugation at 4 °C for 5 mins at 5000 rpm and washed  
532 twice by resuspending in ice-cold sterile dH<sub>2</sub>O water and centrifugation. Cell pellet was snap-  
533 frozen using liquid nitrogen and stored at -80 °C for cDNA synthesis. RNA extraction was  
534 performed as described for RNA sequencing above. cDNA synthesis and RT qPCR analysis  
535 was performed using Maxima H Minus First Strand cDNA Synthesis Kit (Thermo Fisher) and  
536 Maxima SYBR Green/Fluorescein qPCR Master Mix (2X) (Thermo Fisher), according to the  
537 manufacturer's instruction. Fold change was calculated using the delta-delta Ct method ( $2^{-\Delta\Delta C_t}$ )  
538 with expression values in glucose as control condition and *CiACT1* as the reference gene for  
539 normalization.

## 540 *Acknowledgments*

541 Authors would like to thank Peter Dahl from Department of Chemistry & Molecular Biology,  
542 Gothenburg University for providing *S. cerevisiae* BY4741 and BY4742 knockout strains and  
543 Dr. Xiang Jiao from Department of Life Sciences, Chalmers University of Technology for  
544 providing the plasmid *p426*. Authors would also like to thank ARS culture collection (NRRL)  
545 for providing us with different lactose metabolizing strains upon request.

## 546 *Funding*

547 This research was funded by Formas, grant number 2017-01417. The AlphaFold2 structure  
548 predictions were enabled by resources provided by the National Academic Infrastructure for  
549 Supercomputing in Sweden (NAISS), partially funded by the Swedish Research Council  
550 through grant agreement no. 2022-06725.

## 551 Author contributions

552 Conceptualization: K.V.R.P. and C.G.; methodology: K.V.R.P., L.Y., K.P., F.F.O., and C.G.;

553 investigation: K.V.R.P., L.Y., K.P., F.F.O., J.L. and C.G.; original manuscript draft preparation:

554 K.V.R.P. and C.G.; and manuscript review and editing: all.

## 555 Availability of data

556 The RNA-Seq datasets are available in the in the European Nucleotide Archive (ENA) with the

557 accession number E-MTAB-6670.

558

## 559 References

- 560 1. Shen, X.X., Opulente, D.A., Kominek, J., Zhou, X., Steenwyk, J.L., Buh, K.V., Haase,  
561 M.A.B., Wisecaver, J.H., Wang, M., Doering, D.T., et al. (2018). Tempo and Mode of  
562 Genome Evolution in the Budding Yeast Subphylum. *Cell* *175*, 1533-1545 e1520.  
563 10.1016/j.cell.2018.10.023.
- 564 2. Capuco, A.V., and Akers, R.M. (2009). The origin and evolution of lactation. *J Biol* *8*,  
565 37. 10.1186/jbiol139.
- 566 3. Schaffrath, R., and Breunig, K.D. (2000). Genetics and molecular physiology of the  
567 yeast *Kluyveromyces lactis*. *Fungal Genet Biol* *30*, 173-190. 10.1006/fgbi.2000.1221.
- 568 4. Godecke, A., Zachariae, W., Arvanitidis, A., and Breunig, K.D. (1991). Coregulation  
569 of the *Kluyveromyces lactis* lactose permease and beta-galactosidase genes is achieved  
570 by interaction of multiple LAC9 binding sites in a 2.6 kbp divergent promoter. *Nucleic*  
571 *Acids Res* *19*, 5351-5358.
- 572 5. Lane, M.M., Burke, N., Karreman, R., Wolfe, K.H., O'Byrne, C.P., and Morrissey, J.P.  
573 (2011). Physiological and metabolic diversity in the yeast *Kluyveromyces marxianus*.  
574 *Antonie van Leeuwenhoek* *100*, 507-519. 10.1007/s10482-011-9606-x.
- 575 6. Varela, J.A., Puricelli, M., Ortiz-Merino, R.A., Giacomobono, R., Braun-Galleani, S.,  
576 Wolfe, K.H., and Morrissey, J.P. (2019). Origin of Lactose Fermentation in  
577 *Kluyveromyces lactis* by Interspecies Transfer of a Neo-functionalized Gene Cluster  
578 during Domestication. *Curr Biol* *29*, 4284-4290 e4282. 10.1016/j.cub.2019.10.044.
- 579 7. Marcus, J.F., DeMarsh, T.A., and Alcaine, S.D. (2021). Upcycling of Whey Permeate  
580 through Yeast- and Mold-Driven Fermentations under Anoxic and Oxic Conditions.  
581 *Fermentation* *7*, 16.
- 582 8. Nascimento, M.F., Barreiros, R., Oliveira, A.C., Ferreira, F.C., and Faria, N.T. (2022).  
583 *Moesziomyces* spp. cultivation using cheese whey: new yeast extract-free media,  $\beta$ -

- 584 galactosidase biosynthesis and mannosylerythritol lipids production. *Biomass*  
585 *Conversion and Biorefinery*. 10.1007/s13399-022-02837-y.
- 586 9. Thoden, J.B., and Holden, H.M. (2007). The molecular architecture of glucose-1-  
587 phosphate uridylyltransferase. *Protein Sci* 16, 432-440. 10.1110/ps.062626007.
- 588 10. Slot, J.C., and Rokas, A. (2010). Multiple GAL pathway gene clusters evolved  
589 independently and by different mechanisms in fungi. *Proc Natl Acad Sci U S A* 107,  
590 10136-10141. 10.1073/pnas.0914418107.
- 591 11. Mojzita, D., Herold, S., Metz, B., Seiboth, B., and Richard, P. (2012). l-xylo-3-Hexulose  
592 Reductase Is the Missing Link in the Oxidoreductive Pathway for d-Galactose  
593 Catabolism in Filamentous Fungi\*. *Journal of Biological Chemistry* 287, 26010-26018.  
594 <https://doi.org/10.1074/jbc.M112.372755>.
- 595 12. Gruben, B.S., Zhou, M., and de Vries, R.P. (2012). GalX regulates the D-galactose  
596 oxido-reductive pathway in *Aspergillus niger*. *FEBS Lett* 586, 3980-3985.  
597 10.1016/j.febslet.2012.09.029.
- 598 13. Liu, J.J., Zhang, G.C., Kwak, S., Oh, E.J., Yun, E.J., Chomvong, K., Cate, J.H.D., and  
599 Jin, Y.S. (2019). Overcoming the thermodynamic equilibrium of an isomerization  
600 reaction through oxidoreductive reactions for biotransformation. *Nat Commun* 10,  
601 1356. 10.1038/s41467-019-09288-6.
- 602 14. Zhang, G., Zayed, H.M., An, Y., Yun, J., Huang, J., Zhang, Y., Li, X., Wang, J.,  
603 Ravikumar, Y., and Qi, X. (2022). Biocatalytic conversion of a lactose-rich dairy waste  
604 into D-tagatose, D-arabitol and galactitol using sequential whole cell and fermentation  
605 technologies. *Bioresource Technology* 358, 127422.  
606 <https://doi.org/10.1016/j.biortech.2022.127422>.
- 607 15. Jagtap, S.S., Bedekar, A.A., Liu, J.J., Jin, Y.S., and Rao, C.V. (2019). Production of  
608 galactitol from galactose by the oleaginous yeast *Rhodospiridium toruloides* IFO0880.  
609 *Biotechnol Biofuels* 12, 250. 10.1186/s13068-019-1586-5.
- 610 16. Harrison, M.C., LaBella, A.L., Hittinger, C.T., and Rokas, A. (2022). The evolution of  
611 the GALactose utilization pathway in budding yeasts. *Trends Genet* 38, 97-106.  
612 10.1016/j.tig.2021.08.013.
- 613 17. Rokas, A., Wisecaver, J.H., and Lind, A.L. (2018). The birth, evolution and death of  
614 metabolic gene clusters in fungi. *Nature Reviews Microbiology* 16, 731-744.  
615 10.1038/s41579-018-0075-3.
- 616 18. Wong, S., and Wolfe, K.H. (2005). Birth of a metabolic gene cluster in yeast by adaptive  
617 gene relocation. *Nat Genet* 37, 777-782. 10.1038/ng1584.
- 618 19. Krause, D.J., Kominek, J., Oplente, D.A., Shen, X.-X., Zhou, X., Langdon, Q.K.,  
619 DeVirgilio, J., Hulfachor, A.B., Kurtzman, C.P., Rokas, A., and Hittinger, C.T. (2018).  
620 Functional and evolutionary characterization of a secondary metabolite gene cluster in

- 621 budding yeasts. *Proceedings of the National Academy of Sciences* *115*, 11030-11035.  
622 doi:10.1073/pnas.1806268115.
- 623 20. de Jongh, W.A., Bro, C., Ostergaard, S., Regenbreg, B., Olsson, L., and Nielsen, J.  
624 (2008). The roles of galactitol, galactose-1-phosphate, and phosphoglucomutase in  
625 galactose-induced toxicity in *Saccharomyces cerevisiae*. *Biotechnol Bioeng* *101*, 317-  
626 326. 10.1002/bit.21890.
- 627 21. Lawrence, J. (1999). Selfish operons: the evolutionary impact of gene clustering in  
628 prokaryotes and eukaryotes. *Current Opinion in Genetics & Development* *9*, 642-648.  
629 [https://doi.org/10.1016/S0959-437X\(99\)00025-8](https://doi.org/10.1016/S0959-437X(99)00025-8).
- 630 22. Martchenko, M., Levitin, A., Hogues, H., Nantel, A., and Whiteway, M. (2007).  
631 Transcriptional rewiring of fungal galactose-metabolism circuitry. *Curr Biol* *17*, 1007-  
632 1013. 10.1016/j.cub.2007.05.017.
- 633 23. Van Ende, M., Wijnants, S., and Van Dijck, P. (2019). Sugar Sensing and Signaling in  
634 *Candida albicans* and *Candida glabrata*. *Front Microbiol* *10*, 99.  
635 10.3389/fmicb.2019.00099.
- 636 24. Peng, G., and Hopper, J.E. (2002). Gene activation by interaction of an inhibitor with a  
637 cytoplasmic signaling protein. *Proceedings of the National Academy of Sciences* *99*,  
638 8548-8553. 10.1073/pnas.142100099.
- 639 25. Bhat, P.J., and Murthy, T.V. (2001). Transcriptional control of the GAL/MEL regulon  
640 of yeast *Saccharomyces cerevisiae*: mechanism of galactose-mediated signal  
641 transduction. *Mol Microbiol* *40*, 1059-1066. 10.1046/j.1365-2958.2001.02421.x.
- 642 26. Meyer, J., Walker-Jonah, A., and Hollenberg, C.P. (1991). Galactokinase encoded by  
643 GAL1 is a bifunctional protein required for induction of the GAL genes in  
644 *Kluyveromyces lactis* and is able to suppress the gal3 phenotype in *Saccharomyces*  
645 *cerevisiae*. *Molecular and Cellular Biology* *11*, 5454-5461.  
646 doi:10.1128/mcb.11.11.5454-5461.1991.
- 647 27. Halvorsen, Y.C., Nandabalan, K., and Dickson, R.C. (1990). LAC9 DNA-binding  
648 domain coordinates two zinc atoms per monomer and contacts DNA as a dimer. *Journal*  
649 *of Biological Chemistry* *265*, 13283-13289. [https://doi.org/10.1016/S0021-](https://doi.org/10.1016/S0021-9258(19)38296-1)  
650 [9258\(19\)38296-1](https://doi.org/10.1016/S0021-9258(19)38296-1).
- 651 28. Dalal, C.K., Zuleta, I.A., Mitchell, K.F., Andes, D.R., El-Samad, H., and Johnson, A.D.  
652 (2016). Transcriptional rewiring over evolutionary timescales changes quantitative and  
653 qualitative properties of gene expression. *Elife* *5*. 10.7554/eLife.18981.
- 654 29. Sun, X., Yu, J., Zhu, C., Mo, X., Sun, Q., Yang, D., Su, C., and Lu, Y. (2023).  
655 Recognition of galactose by a scaffold protein recruits a transcriptional activator for the  
656 GAL regulon induction in *Candida albicans*. *Elife* *12*. 10.7554/eLife.84155.
- 657 30. Wu, J., Hu, J., Zhao, S., He, M., Hu, G., Ge, X., and Peng, N. (2018). Single-cell Protein  
658 and Xylitol Production by a Novel Yeast Strain *Candida intermedia* FL023 from

- 659 Lignocellulosic Hydrolysates and Xylose. *Appl Biochem Biotechnol* 185, 163-178.  
660 10.1007/s12010-017-2644-8.
- 661 31. Gardonyi, M., Osterberg, M., Rodrigues, C., Spencer-Martins, I., and Hahn-Hagerdal,  
662 B. (2003). High capacity xylose transport in *Candida intermedia* PYCC 4715. *FEMS*  
663 *Yeast Res* 3, 45-52. 10.1111/j.1567-1364.2003.tb00137.x.
- 664 32. Fonseca, C., Olofsson, K., Ferreira, C., Runquist, D., Fonseca, L.L., Hahn-Hagerdal, B.,  
665 and Liden, G. (2011). The glucose/xylose facilitator *Gxf1* from *Candida intermedia*  
666 expressed in a xylose-fermenting industrial strain of *Saccharomyces cerevisiae*  
667 increases xylose uptake in SSCF of wheat straw. *Enzyme Microb Technol* 48, 518-525.  
668 10.1016/j.enzmictec.2011.02.010.
- 669 33. Moreno, A.D., Carbone, A., Pavone, R., Olsson, L., and Geijer, C. (2019). Evolutionary  
670 engineered *Candida intermedia* exhibits improved xylose utilization and robustness to  
671 lignocellulose-derived inhibitors and ethanol. *Appl Microbiol Biotechnol* 103, 1405-  
672 1416. 10.1007/s00253-018-9528-x.
- 673 34. Mayr, P., Bruggler, K., Kulbe, K.D., and Nidetzky, B. (2000). D-Xylose metabolism by  
674 *Candida intermedia*: isolation and characterisation of two forms of aldose reductase  
675 with different coenzyme specificities. *J Chromatogr B Biomed Sci Appl* 737, 195-202.  
676 10.1016/s0378-4347(99)00380-1.
- 677 35. Nidetzky, B., Bruggler, K., Kratzer, R., and Mayr, P. (2003). Multiple forms of xylose  
678 reductase in *Candida intermedia*: comparison of their functional properties using  
679 quantitative structure-activity relationships, steady-state kinetic analysis, and pH  
680 studies. *J Agric Food Chem* 51, 7930-7935. 10.1021/jf034426j.
- 681 36. Yonten, V., and Aktas, N. (2014). Exploring the optimum conditions for maximizing  
682 the microbial growth of *Candida intermedia* by response surface methodology. *Prep*  
683 *Biochem Biotechnol* 44, 26-39. 10.1080/10826068.2013.782044.
- 684 37. Geijer, C., Faria-Oliveira, F., Moreno, A.D., Stenberg, S., Mazurkewich, S., and Olsson,  
685 L. (2020). Genomic and transcriptomic analysis of *Candida intermedia* reveals the  
686 genetic determinants for its xylose-converting capacity. *Biotechnol Biofuels* 13, 48.  
687 10.1186/s13068-020-1663-9.
- 688 38. Moreno, A.D., Tellgren-Roth, C., Soler, L., Dainat, J., Olsson, L., and Geijer, C. (2017).  
689 Complete Genome Sequences of the Xylose-Fermenting *Candida intermedia* Strains  
690 CBS 141442 and PYCC 4715. *Genome Announc* 5. 10.1128/genomeA.00138-17.
- 691 39. Peri, K.V.R., Faria-Oliveira, F., Larsson, A., Plovie, A., Papon, N., and Geijer, C.  
692 (2023). Split-marker-mediated genome editing improves homologous recombination  
693 frequency in the CTG clade yeast *Candida intermedia*. *FEMS Yeast Res* 23.  
694 10.1093/femsyr/foad016.
- 695 40. Wray, L.V., Jr., Witte, M.M., Dickson, R.C., and Riley, M.I. (1987). Characterization  
696 of a positive regulatory gene, *LAC9*, that controls induction of the lactose-galactose

- 697 regulon of *Kluyveromyces lactis*: structural and functional relationships to GAL4 of  
698 *Saccharomyces cerevisiae*. *Mol Cell Biol* 7, 1111-1121. 10.1128/mcb.7.3.1111-  
699 1121.1987.
- 700 41. Douglas, H.C., and Hawthorne, D.C. (1964). ENZYMATIC EXPRESSION AND  
701 GENETIC LINKAGE OF GENES CONTROLLING GALACTOSE UTILIZATION  
702 IN SACCHAROMYCES. *Genetics* 49, 837-844. 10.1093/genetics/49.5.837.
- 703 42. Bailey, T.L., Johnson, J., Grant, C.E., and Noble, W.S. (2015). The MEME Suite.  
704 *Nucleic Acids Research* 43, W39-W49. 10.1093/nar/gkv416.
- 705 43. Thoden, J.B., Sellick, C.A., Timson, D.J., Reece, R.J., and Holden, H.M. (2005).  
706 Molecular structure of *Saccharomyces cerevisiae* Gal1p, a bifunctional galactokinase  
707 and transcriptional inducer. *J Biol Chem* 280, 36905-36911. 10.1074/jbc.M508446200.
- 708 44. Jumper, J., Evans, R., Pritzel, A., Green, T., Figurnov, M., Ronneberger, O.,  
709 Tunyasuvunakool, K., Bates, R., Zidek, A., Potapenko, A., et al. (2021). Highly accurate  
710 protein structure prediction with AlphaFold. *Nature* 596, 583-589. 10.1038/s41586-  
711 021-03819-2.
- 712 45. Hittinger, C.T., and Carroll, S.B. (2007). Gene duplication and the adaptive evolution  
713 of a classic genetic switch. *Nature* 449, 677-681. 10.1038/nature06151.
- 714 46. Geronikou, A., Larsen, N., Lillevang, S.K., and Jespersen, L. (2022). Occurrence and  
715 Identification of Yeasts in Production of White-Brined Cheese. *Microorganisms* 10,  
716 1079.
- 717 47. TANJI, M., NAMIMATSU, K., KINOSHITA, M., MOTOSHIMA, H., ODA, Y., and  
718 OHNISHI, M. (2004). Content and Chemical Compositions of Cerebrosides in Lactose-  
719 assimilating Yeasts. *Bioscience, Biotechnology, and Biochemistry* 68, 2205-2208.  
720 10.1271/bbb.68.2205.
- 721 48. Yano, K., and Fukasawa, T. (1997). Galactose-dependent reversible interaction of  
722 Gal3p with Gal80p in the induction pathway of Gal4p-activated genes of  
723 *Saccharomyces cerevisiae*. *Proc Natl Acad Sci U S A* 94, 1721-1726.  
724 10.1073/pnas.94.5.1721.
- 725 49. Tesfaw, A., Oner, E.T., and Assefa, F. (2021). Evaluating crude whey for bioethanol  
726 production using non-*Saccharomyces* yeast, *Kluyveromyces marxianus*. *SN Applied*  
727 *Sciences* 3, 42. 10.1007/s42452-020-03996-1.
- 728 50. Maullu, C., Lampis, G., Desogus, A., Ingianni, A., Rossolini, G.M., and Pompei, R.  
729 (1999). High-level production of heterologous protein by engineered yeasts grown in  
730 cottage cheese whey. *Appl Environ Microbiol* 65, 2745-2747. 10.1128/aem.65.6.2745-  
731 2747.1999.
- 732 51. Urit, T., Stukert, A., Bley, T., and Löser, C. (2012). Formation of ethyl acetate by  
733 *Kluyveromyces marxianus* on whey during aerobic batch cultivation at specific trace



- 734 element limitation. *Appl Microbiol Biotechnol* *96*, 1313-1323. 10.1007/s00253-012-  
735 4107-z.
- 736 52. Santana, D.J., and O'Meara, T.R. (2021). Forward and reverse genetic dissection of  
737 morphogenesis identifies filament-competent *Candida auris* strains. *Nat Commun* *12*,  
738 7197. 10.1038/s41467-021-27545-5.
- 739 53. Gietz, R.D., and Schiestl, R.H. (2007). High-efficiency yeast transformation using the  
740 LiAc/SS carrier DNA/PEG method. *Nature Protocols* *2*, 31-34. 10.1038/nprot.2007.13.
- 741 54. Verduyn, C., Postma, E., Scheffers, W.A., and Van Dijken, J.P. (1992). Effect of  
742 benzoic acid on metabolic fluxes in yeasts: a continuous-culture study on the regulation  
743 of respiration and alcoholic fermentation. *Yeast* *8*, 501-517. 10.1002/yea.320080703.
- 744 55. Bruder, S., Reifenrath, M., Thomik, T., Boles, E., and Herzog, K. (2016). Parallelised  
745 online biomass monitoring in shake flasks enables efficient strain and carbon source  
746 dependent growth characterisation of *Saccharomyces cerevisiae*. *Microb Cell Fact* *15*,  
747 127. 10.1186/s12934-016-0526-3.
- 748 56. Bruder, S., Reifenrath, M., Thomik, T., Boles, E., and Herzog, K. (2016). Parallelised  
749 online biomass monitoring in shake flasks enables efficient strain and carbon source  
750 dependent growth characterisation of *Saccharomyces cerevisiae*. *Microbial Cell*  
751 *Factories* *15*, 127. 10.1186/s12934-016-0526-3.
- 752 57. Goncalves, C., Wisecaver, J.H., Kominek, J., Oom, M.S., Leandro, M.J., Shen, X.X.,  
753 Opulente, D.A., Zhou, X., Peris, D., Kurtzman, C.P., et al. (2018). Evidence for loss and  
754 reacquisition of alcoholic fermentation in a fructophilic yeast lineage. *Elife* *7*.  
755 10.7554/eLife.33034.
- 756 58. Katoh, K., and Standley, D.M. (2013). MAFFT multiple sequence alignment software  
757 version 7: improvements in performance and usability. *Mol Biol Evol* *30*, 772-780.  
758 10.1093/molbev/mst010.
- 759 59. Capella-Gutiérrez, S., Silla-Martínez, J.M., and Gabaldón, T. (2009). trimAl: a tool for  
760 automated alignment trimming in large-scale phylogenetic analyses. *Bioinformatics* *25*,  
761 1972-1973. 10.1093/bioinformatics/btp348.
- 762 60. Nguyen, L.T., Schmidt, H.A., von Haeseler, A., and Minh, B.Q. (2015). IQ-TREE: a  
763 fast and effective stochastic algorithm for estimating maximum-likelihood phylogenies.  
764 *Mol Biol Evol* *32*, 268-274. 10.1093/molbev/msu300.
- 765 61. Minh, B.Q., Nguyen, M.A., and von Haeseler, A. (2013). Ultrafast approximation for  
766 phylogenetic bootstrap. *Mol Biol Evol* *30*, 1188-1195. 10.1093/molbev/mst024.
- 767 62. Letunic, I., and Bork, P. (2019). Interactive Tree Of Life (iTOL) v4: recent updates and  
768 new developments. *Nucleic Acids Res* *47*, W256-w259. 10.1093/nar/gkz239.

- 769 63. Gupta, S., Stamatoyannopoulos, J.A., Bailey, T.L., and Noble, W.S. (2007).  
770 Quantifying similarity between motifs. *Genome Biology* 8, R24. 10.1186/gb-2007-8-2-  
771 r24.
- 772 64. Teixeira, M.C., Viana, R., Palma, M., Oliveira, J., Galocha, M., Mota, M.N., Couceiro,  
773 D., Pereira, M.G., Antunes, M., Costa, I.V., et al. (2022). YEASTRACT+: a portal for  
774 the exploitation of global transcription regulation and metabolic model data in yeast  
775 biotechnology and pathogenesis. *Nucleic Acids Research* 51, D785-D791.  
776 10.1093/nar/gkac1041.
- 777 65. Andrews, S. (2010). FastQC: a quality control tool for high throughput sequence data.  
778 Babraham Bioinformatics, Babraham Institute, Cambridge, United Kingdom.
- 779 66. Dobin, A., Davis, C.A., Schlesinger, F., Drenkow, J., Zaleski, C., Jha, S., Batut, P.,  
780 Chaisson, M., and Gingeras, T.R. (2013). STAR: ultrafast universal RNA-seq aligner.  
781 *Bioinformatics* 29, 15-21.
- 782 67. Robinson, M.D., McCarthy, D.J., and Smyth, G.K. (2010). edgeR: a Bioconductor  
783 package for differential expression analysis of digital gene expression data.  
784 *Bioinformatics* 26, 139-140.
- 785 68. Smyth, G.K. (2005). Limma: linear models for microarray data. In *Bioinformatics and*  
786 *computational biology solutions using R and Bioconductor*, (Springer), pp. 397-420.
- 787 69. Love, M.I., Huber, W., and Anders, S. (2014). Moderated estimation of fold change and  
788 dispersion for RNA-seq data with DESeq2. *Genome biology* 15, 1-21.
- 789
- 790

791 Figures and Figure legends:

792

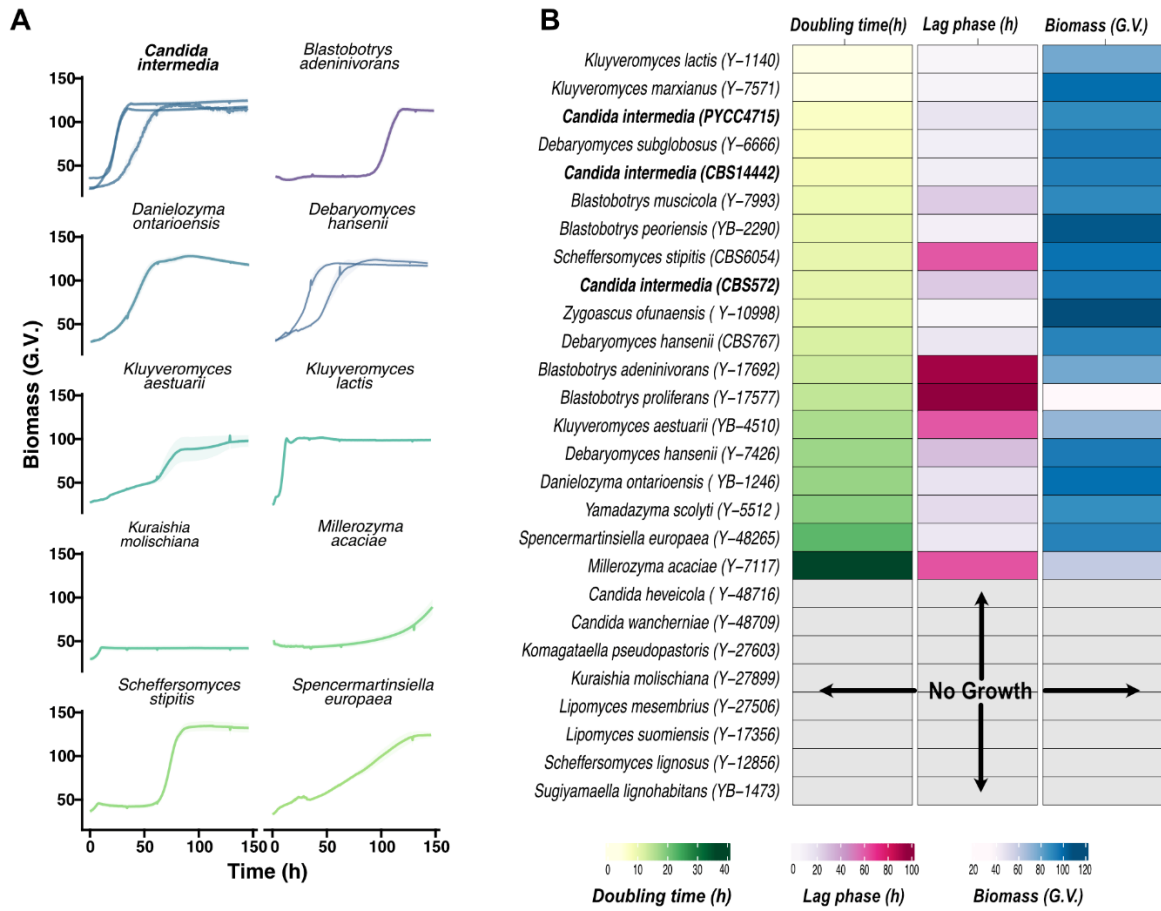

793

794 Figure 1: *Candida intermedia* is one of the top five fastest lactose-growing yeast species. A)  
 795 Representative growth profiles of 10/24 lactose-yeast species including three different *C. intermedia*  
 796 strains. The graphs depict data procured from GrowthProfiler in 96-well format, represented as mean  $\pm$   
 797 standard deviation (shaded region) for biological triplicates. On y-axis final biomass is depicted in green  
 798 values (G.V. - corresponding to growth based on pixel counts, as determined by a GrowthProfiler  
 799 instrument) and is plotted against time (h) on x-axis. B) Heat map showing doubling time (h), lag phase  
 800 duration (h) and final biomass (green values – G.V.) measured for all the tested strains in minimal media  
 801 containing lactose as the sole carbon source and plotted as an average of three biological replicates.  
 802 Strains are ranked based on their doubling time, from low to high.

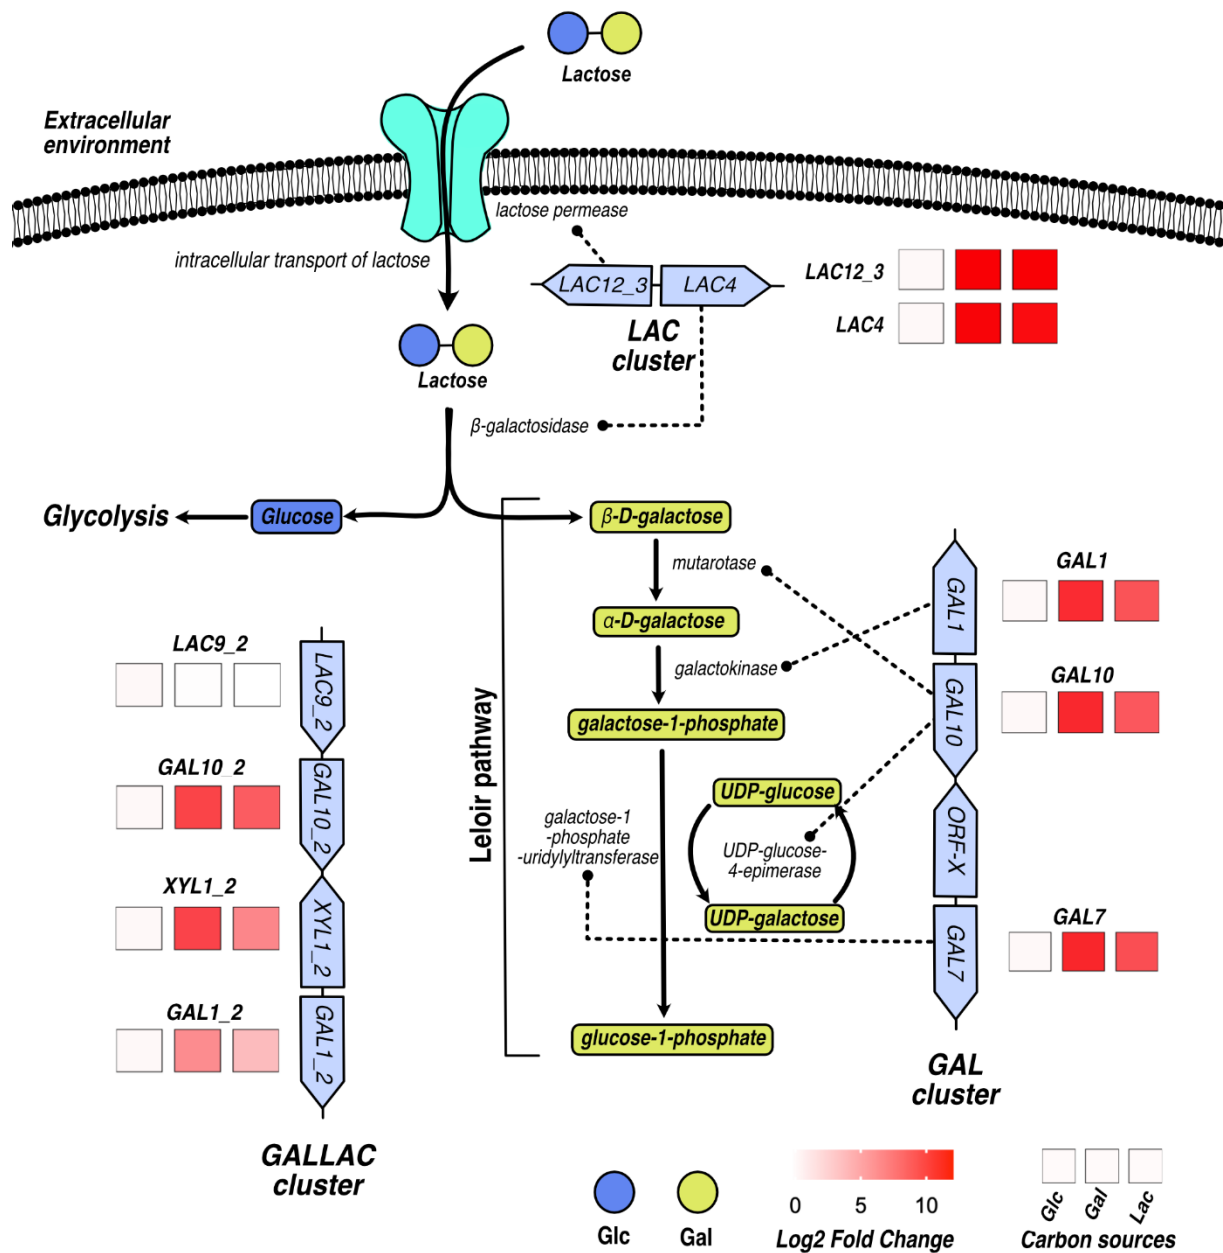

803

804 **Figure 2: Genomic and transcriptomic analyses identified three gene clusters involved in lactose**  
 805 **and galactose assimilation:** A schematic representation of lactose and galactose metabolic pathways  
 806 and results of RNAseq data analysis showing expression of different genes (as present in clusters)  
 807 upregulated in galactose or lactose compared to glucose. Lactose uptake and transport into the cell is  
 808 enabled by *LAC12\_3* encoded lactose permease followed by hydrolysis to glucose (blue circle: Glc) and  
 809 galactose (yellow circle: Gal) enabled by *LAC4* encoded  $\beta$ -galactosidase enzyme. Glucose is further  
 810 metabolized via glycolysis. Galactose is metabolized via the Leloir pathway, encoded by three clustered  
 811 genes, *GAL1* (galactokinase), *GAL7* (galactose-1-phosphate-uridylyltransferase) and *GAL10*  
 812 (mutarotase and UDP-glucose-4-epimerase). The enzymatic functions for the genes are depicted by  
 813 dotted lines based on genome sequence data for *C. intermedia* CBS141442. Legend shows Log2 fold  
 814 change with carbon sources tested represented as Glc for 2% glucose, Gal for 2% galactose and Lac for  
 815 2% lactose containing media. Gene expression log fold change is normalized with glucose as control.

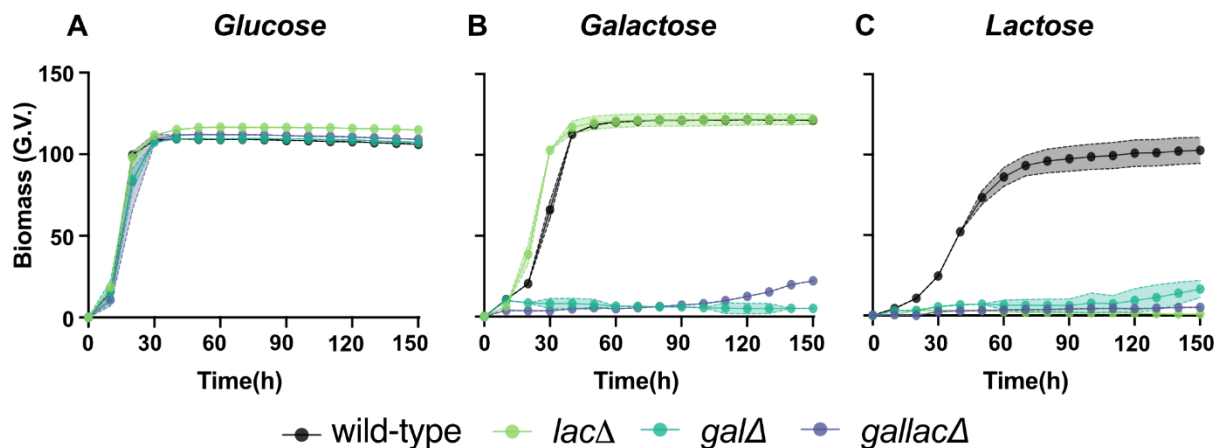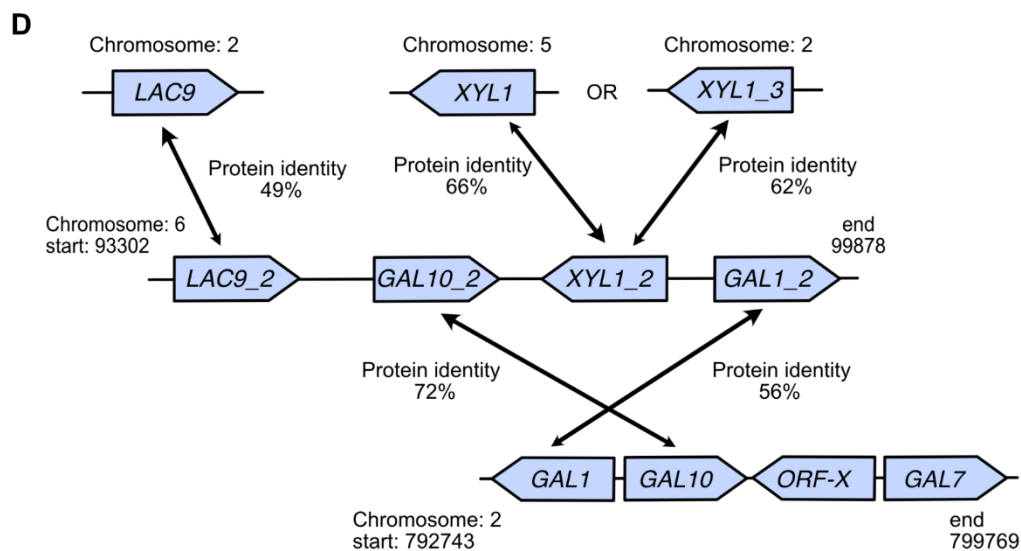

816

817 **Figure 3: The *GALLAC* cluster is essential for growth on lactose and galactose and is unique to *C.***  
 818 ***intermedia*:** Cluster deletion mutants of *C. intermedia* were characterized by growth on glucose (A),  
 819 galactose (B) lactose (C) in growth profiler. Legend shows the wild-type strain (black), *LAC* cluster  
 820 mutant (light green), *GAL* cluster deletion mutant (dark green) and *GALLAC* cluster deletion mutant  
 821 (purple), depicted in the graph with biomass as green values (G.V. - corresponding to growth based on  
 822 pixel counts, as determined by a GrowthProfiler instrument) on the y-axis against time(h) on the x-axis.  
 823 Data are represented as mean  $\pm$  standard deviation (shaded region) for biological triplicates indicated by  
 824 colors: wild type – black, lac cluster mutant – light green, gal cluster mutant – dark green and gallac  
 825 cluster mutant – purple. D) Graphical representation of genomic location of cluster and individual genes  
 826 which are paralogs to *GALLAC* gene cluster and their protein identity as per comparative genomics  
 827 analysis. Arrows depict assumed duplication events which are still unclear.

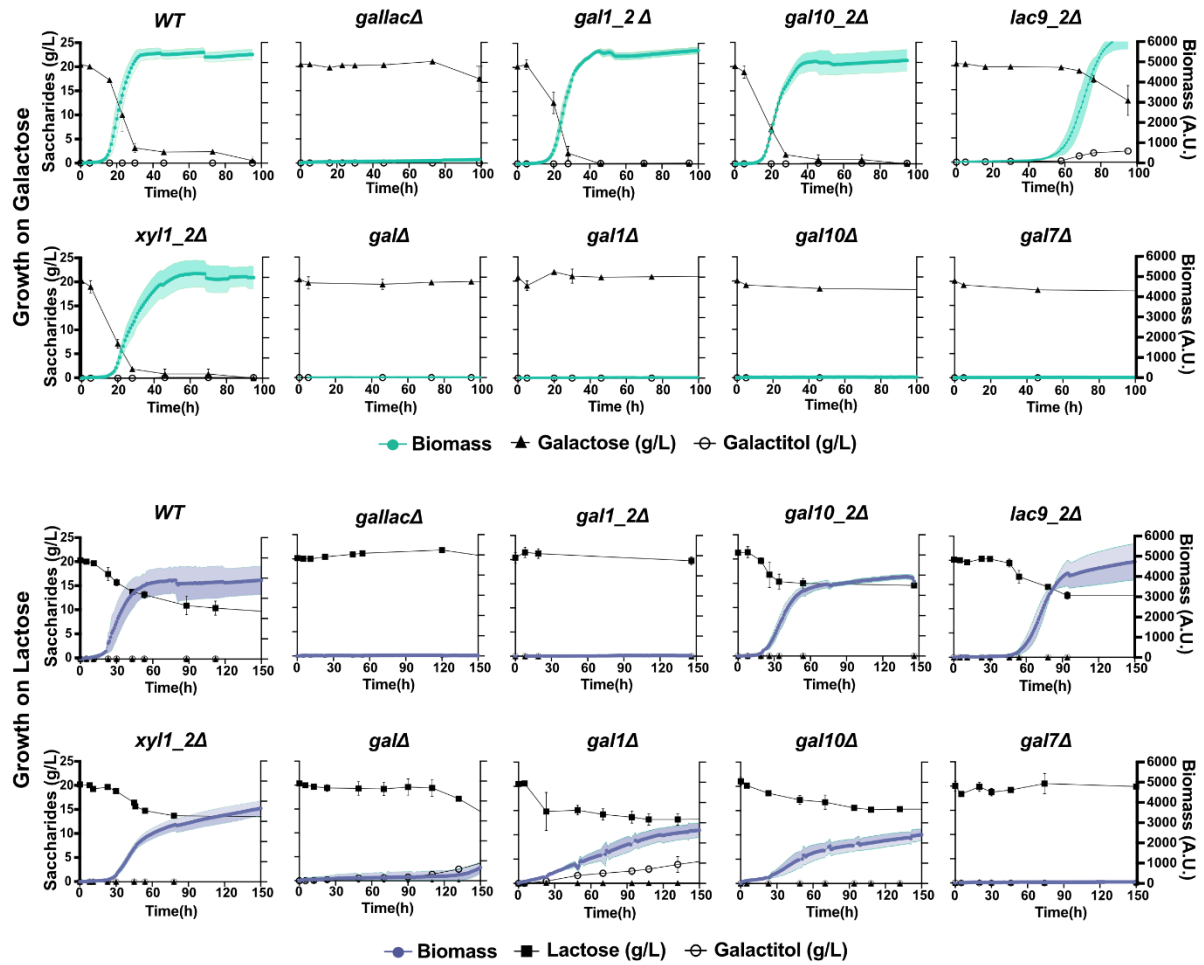

828

829 **Figure 4: Deletion of individual genes in the *GAL* and *GALLAC* clusters reveals importance of Lac9**  
 830 **and Gal1\_2 for (ga)lactose metabolism:** Growth and metabolite profiles for deletion mutants of  
 831 individual genes in the *GAL* and *GALLAC* cluster of *C. intermedia*, in both galactose (top two rows) and  
 832 lactose (bottom two rows) containing media. Graphs represent biomass (filled circle; gal – dark green;  
 833 lac- purple) on the right y-axis, consumption of respective sugars (filled triangle for galactose in g/L or  
 834 filled square for lactose in g/L) and metabolite production (open circle for galactitol in g/L) on the left  
 835 y-axis (depicted by saccharides (g/L), plotted against time (h) on x-axis. Data are represented as mean  
 836  $\pm$  standard deviation (shaded region for biomass and bars for sugars and metabolites) for biological  
 837 triplicates.

838

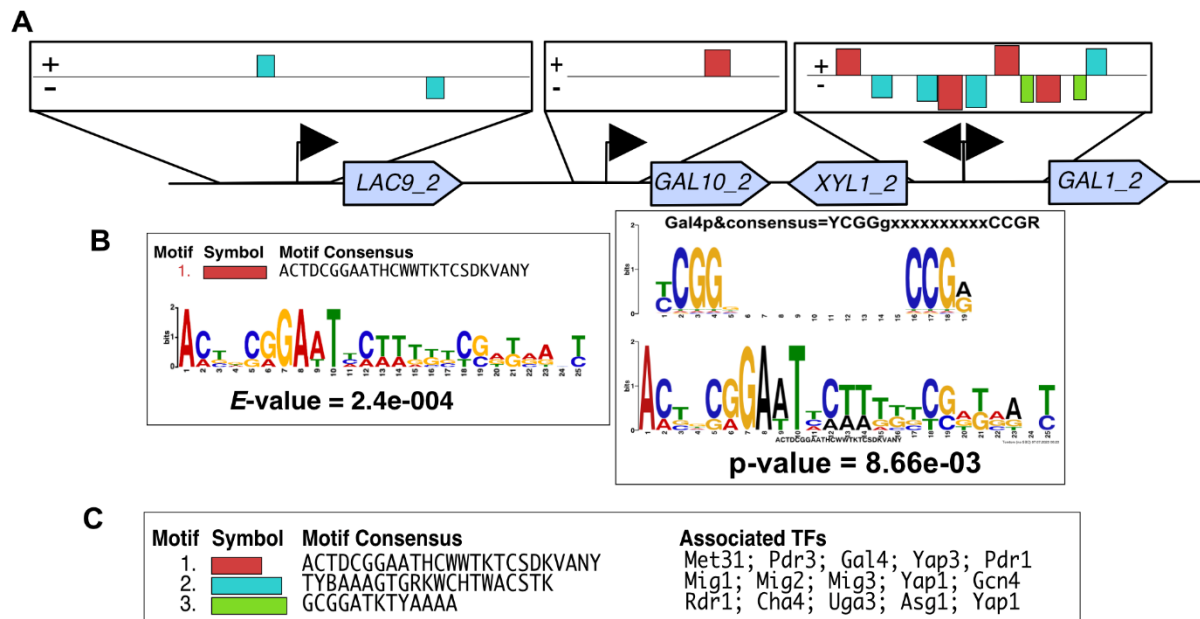

839

840 Figure 5: **Lac9 binding motifs are found in promoters in the *GALLAC* cluster:** A) Graphical  
 841 representation of results of transcription binding motif analysis for promoters of individual genes of the  
 842 *GALLAC* cluster, using MEME (version 5.5.43). *GALLAC* gene cluster with the location of three  
 843 statistically significant promoter binding motifs found in the promoters of the cluster genes. B) Motif  
 844 consensus of the binding motif with the lowest E-value score of the overall match of the motif in the  
 845 input sequence. Depiction of the Gal4p consensus sequence and its associated p-value. C) List of three  
 846 (statistically significant) motifs found in the promoters of *GALLAC* cluster genes and the transcription  
 847 factors associated to these motifs derived from Yeasttract database using TomTom.

848

849

850

851

852

853

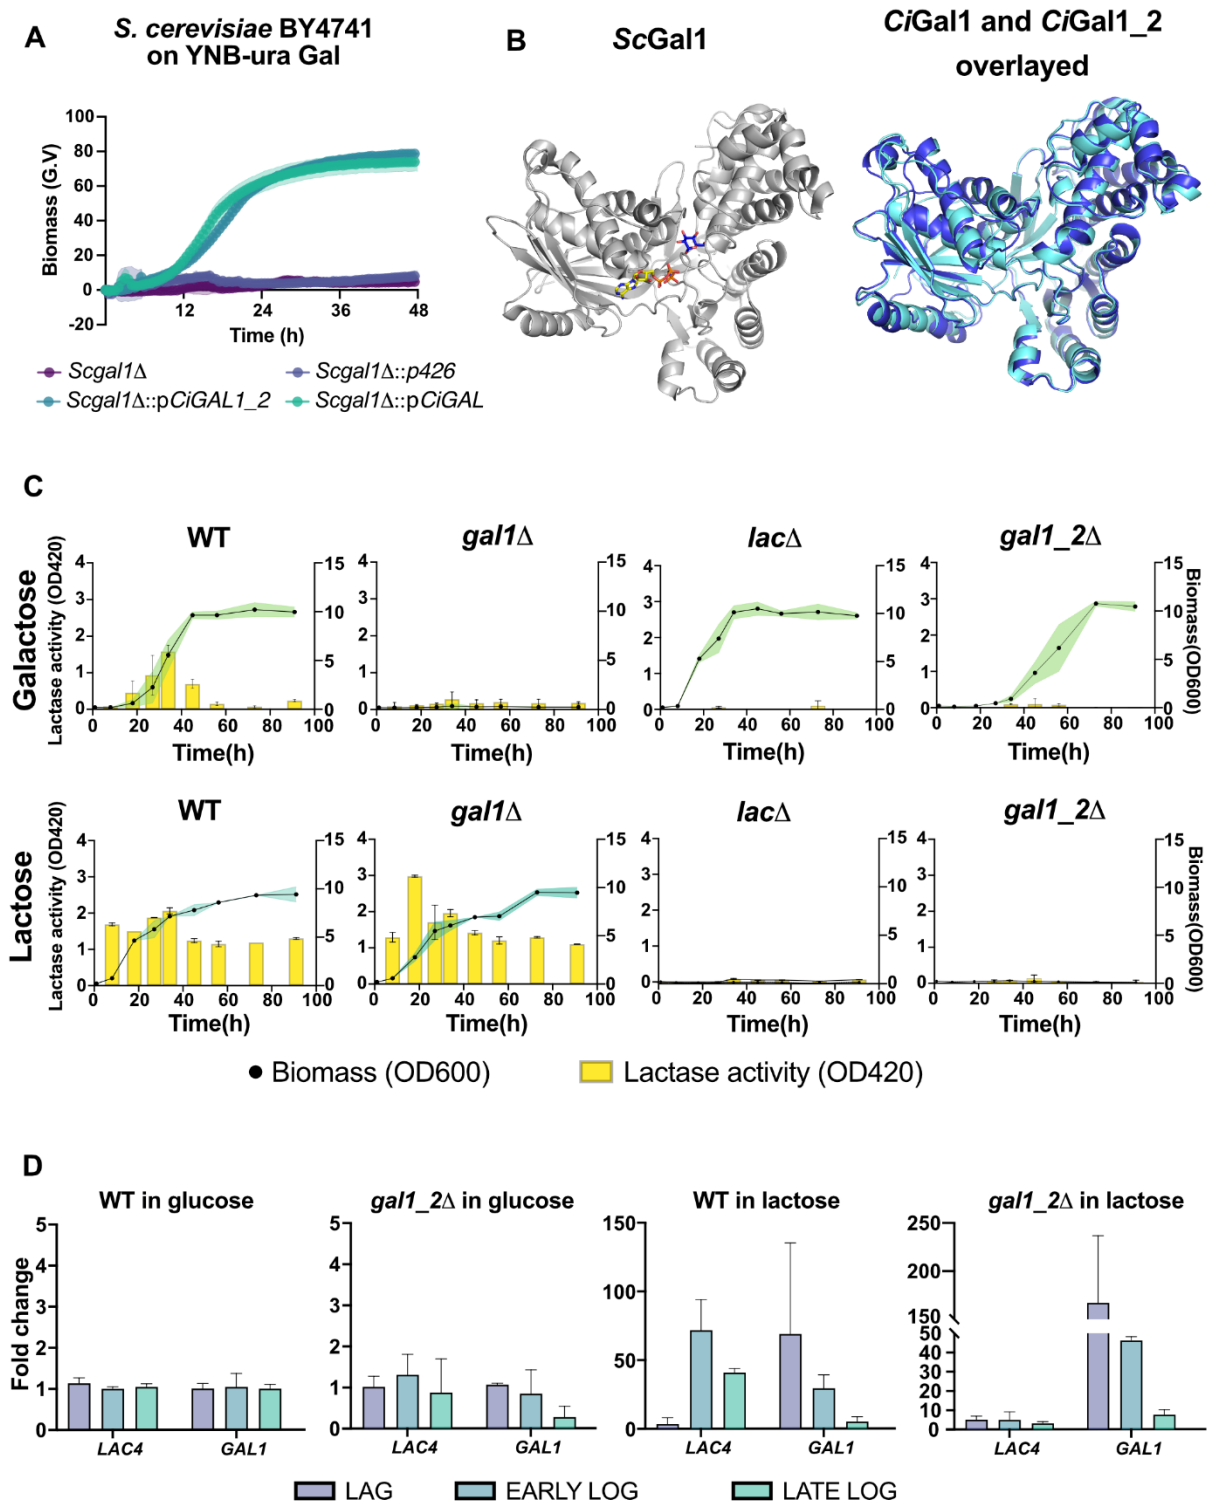

854

855 **Figure 6: Characterization of *C. intermedia*'s Gal1 and Gal1\_2 proteins reveals important**  
 856 **functional differences:** A) Results of complementation of codon optimized *CiGAL1* and *CiGAL1\_2* by  
 857 heterologous expression in *S. cerevisiae* (BY4741) *gal1Δ* mutant. Growth profiles are depicted for  
 858 *Scgal1Δ* (dark purple), *Scgal1Δ* with plasmid p426 containing URA marker (light purple), *Scgal1Δ* with



859 *pCiGAL1\_2* containing *URA3* marker with codon-optimized *CiGAL1\_2* (dark green) and *Scgal1Δ* with  
860 *pCiGAL1* containing *URA3* marker with codon-optimized *CiGAL1*). Time (in hours) on x-axis is plotted  
861 against biomass (green values – G.V.) on y-axis. Data are represented as mean ± standard deviation  
862 (shaded region for biomass) for biological triplicates. B) Structure of ScGal1 (grey) in complex with  
863 AMPPNP and α-galactose next to the superimposed Alphafold2-predicted structures of Gal1 (cyan) and  
864 Gal1\_2 (blue) in the same orientation, showing their high structural similarity C) β-galactosidase assay  
865 on galactose- and lactose- grown cultures of wild type, *lacΔ*, *gal1Δ* and *gal1\_2Δ* strains of *C. intermedia*.  
866 Graphs show lactase activity (OD420) plotted on left y-axis against time (in hours) on x-axis and  
867 biomass (OD<sub>600</sub>) plotted on right y-axis. D) Quantitative PCR results for *LAC4* and *GAL1* gene  
868 expression in *C. intermedia* wild-type and *gal1\_2Δ* grown in glucose or lactose. Samples were taken  
869 during different growth phases (On glucose, Lag = 5h, Early log = 10h and late log = 20h and on lactose,  
870 Lag = 5h, early log = 24h, late log = 44h). Data are represented as mean ± standard deviation (error bars)  
871 for biological and technical triplicates.

872

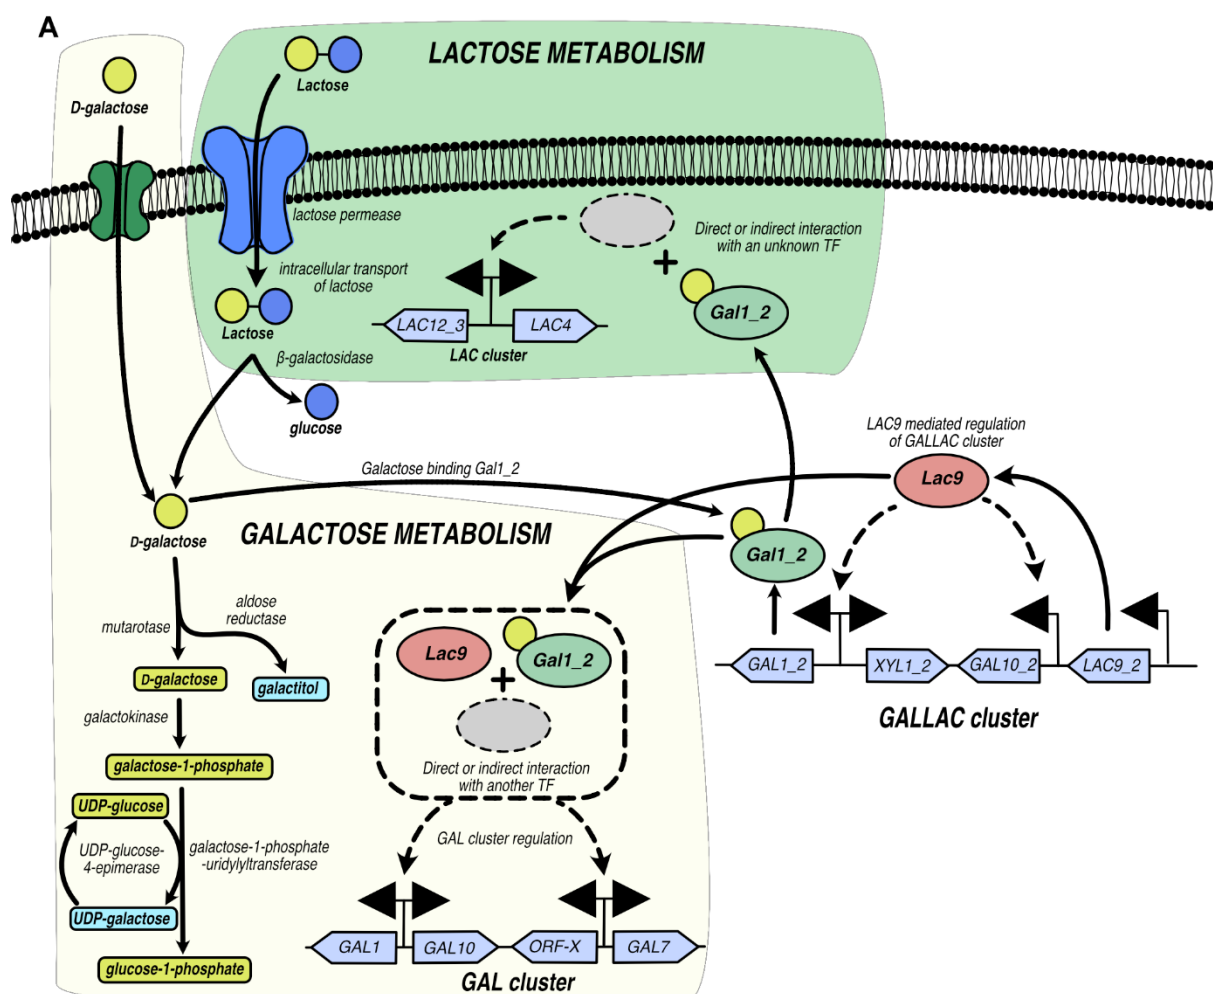

**B S. cerevisiae**

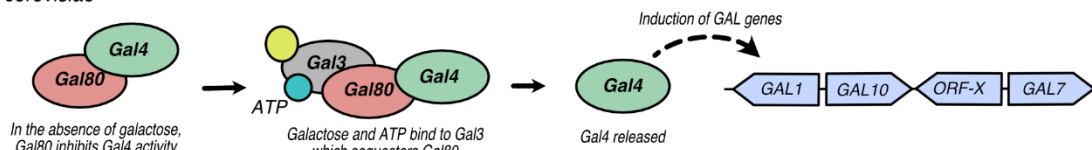

**C K. lactis**

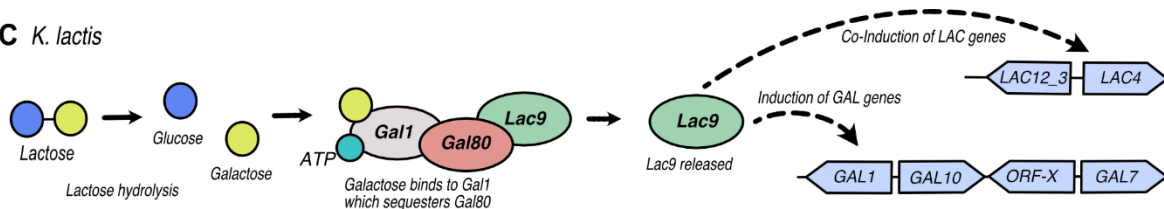

**D C. albicans**

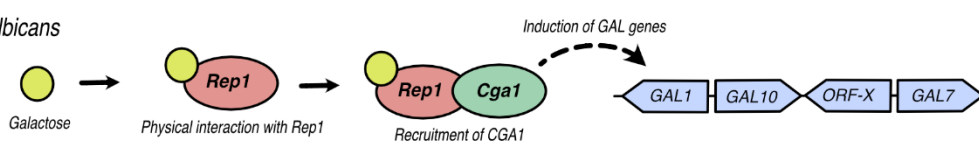

873

874 **Figure 7: Graphic representation of regulatory mechanisms in *C. intermedia* and other yeast**  
875 **species:** A) Depiction of lactose (green box) and galactose (light yellow box) metabolism in *C.*  
876 *intermedia* with the regulation of *GALLAC* cluster by the transcription factor CiLac9. On galactose,  
877 Lac9 and Gal1\_2 interact directly or indirectly resulting in the regulation of *GAL* cluster gene(s), thus,  
878 affecting *C. intermedia*'s growth. On lactose, our results show that Gal1\_2 from the *GALLAC* cluster  
879 regulates the *LAC* cluster at a transcriptional level. This effect of Gal1\_2 can be speculated to be indirect  
880 due to the inability of Gal1\_2 to bind DNA or protein based on predicted structure. Graphical  
881 representation also illustrates the overflow metabolism in *C. intermedia* because of aldose reductase  
882 mediated conversion of galactose to galactitol. B) Regulation of galactose metabolism in *S. cerevisiae*  
883 by the Gal3-Gal80-Gal4 system where galactose and ATP induce Gal3 to bind Gal80 resulting in the  
884 activation of Gal4. Thus, Gal4 induces structural *GAL* genes. C) Regulation of (ga)lactose genes in *K.*  
885 *lactis* is mediated by the bi-functional KIGal1. The ScGal4 homolog in *K. lactis* (KIGal1) is induced by  
886 galactose (or galactose derived from lactose) resulting in sequestering Gal80 and relieving Gal4  
887 homolog, Lac9, which in turn activates the interconnected galactose and lactose metabolic genes in this  
888 yeast. C) Graphic representation of the Rep1 and Cgal mediated galactose regulatory system in *C.*  
889 *albicans*. Galactose physically binds to Rep1 resulting in recruitment of Cgal and the complex  
890 ultimately induces the structural genes responsible for galactose metabolism in this yeast.

891

892 Supplementary figures and figure legends

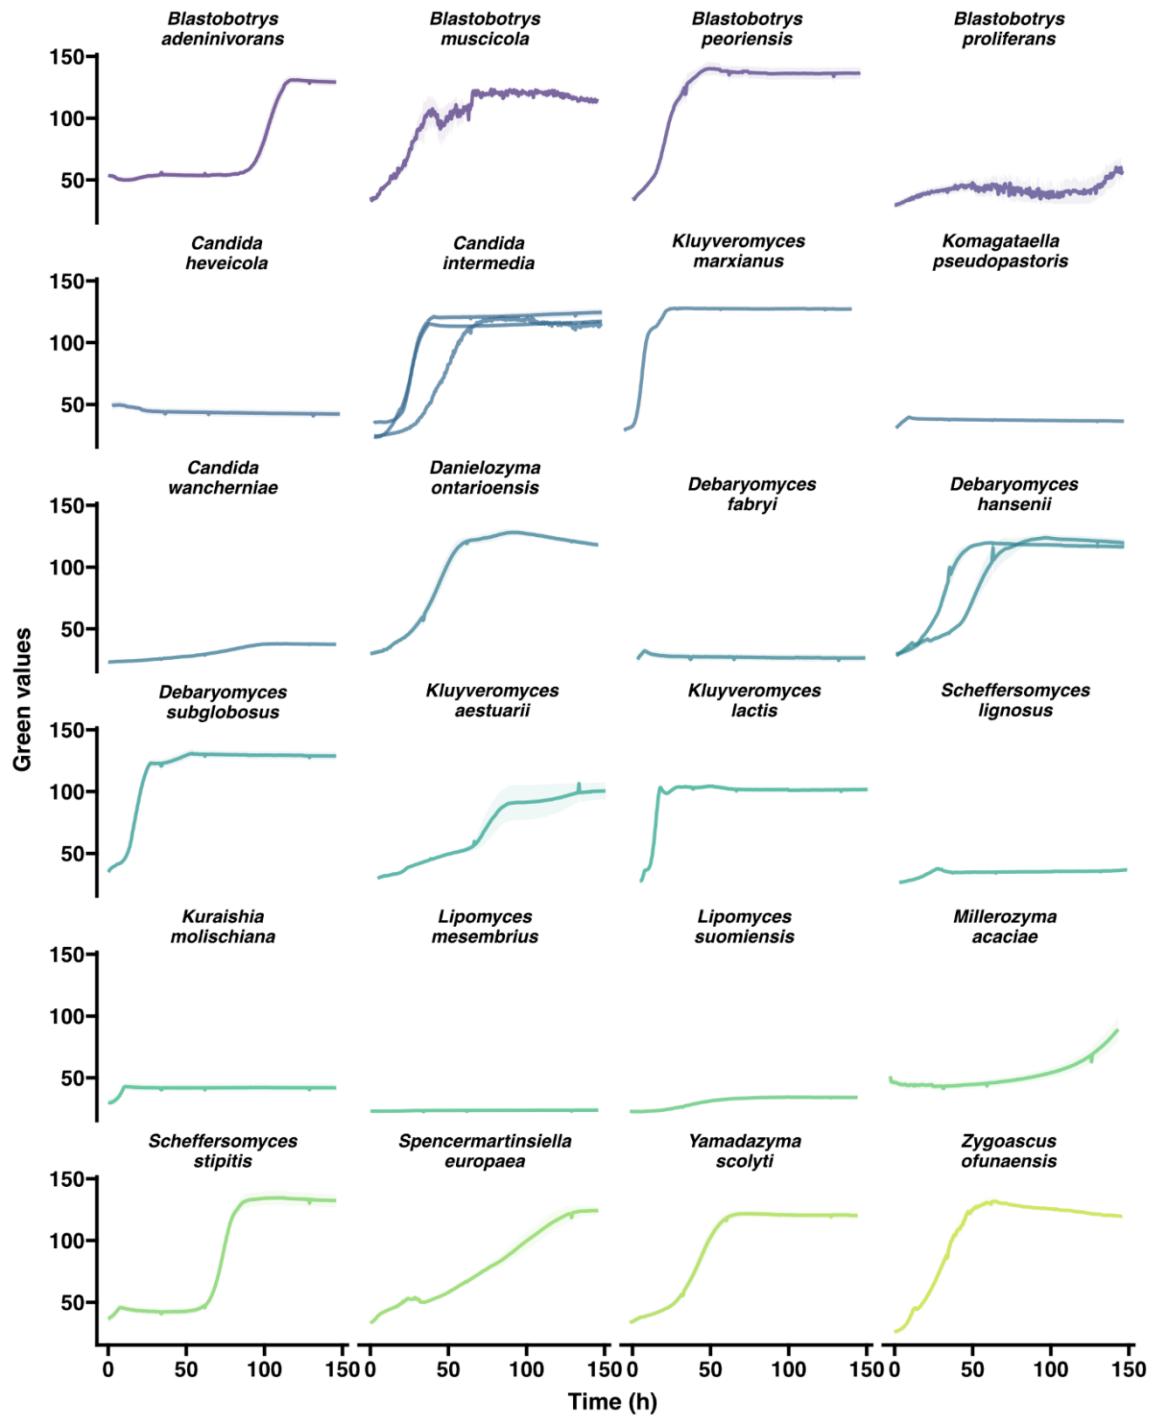

893

894 Figure S 1: Growth curves for 24 lactose growing species from the work of Shen et al <sup>1</sup>. The graphs  
895 depict data procured from GrowthProfiler in 96-well format, plotted as mean  $\pm$  standard deviation  
896 (shaded region) for biological triplicates per strain. On y-axis final biomass yield is depicted in green  
897 values (G.V. - corresponding to growth based on pixel counts, as determined by a GrowthProfiler  
898 instrument) and is plotted against time (h) on x-axis.

### A Transcription factors

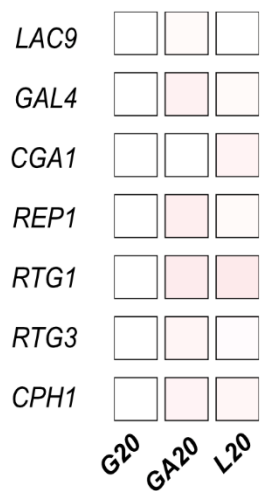

### B LAC12 like genes

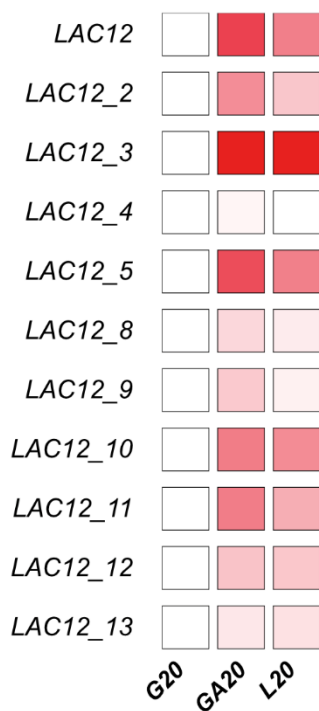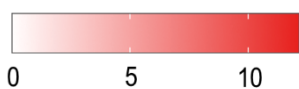

899

900 Figure S 2: Gene expression pattern for different transcription factor orthologues and Lac12 like genes  
901 in *C. intermedia*. Gene expression in Galactose (GA20) and Lactose (L20) have been normalized for  
902 values on Glucose (G20). Legend shows expression (in fold change) from 0 to 10 in increasing gradient  
903 of red.

904

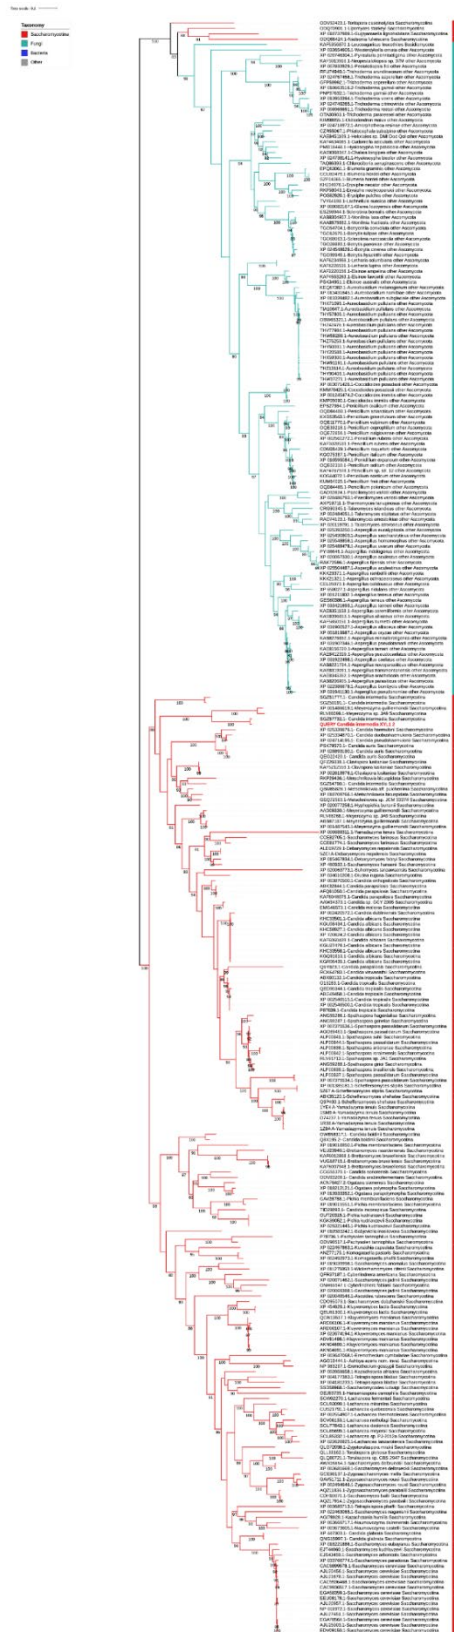

905

906 Figure S 3: Maximum likelihood phylogenetic tree depicting the origin and evolution of the *XYLI\_2*  
907 gene in *C. intermedia*.

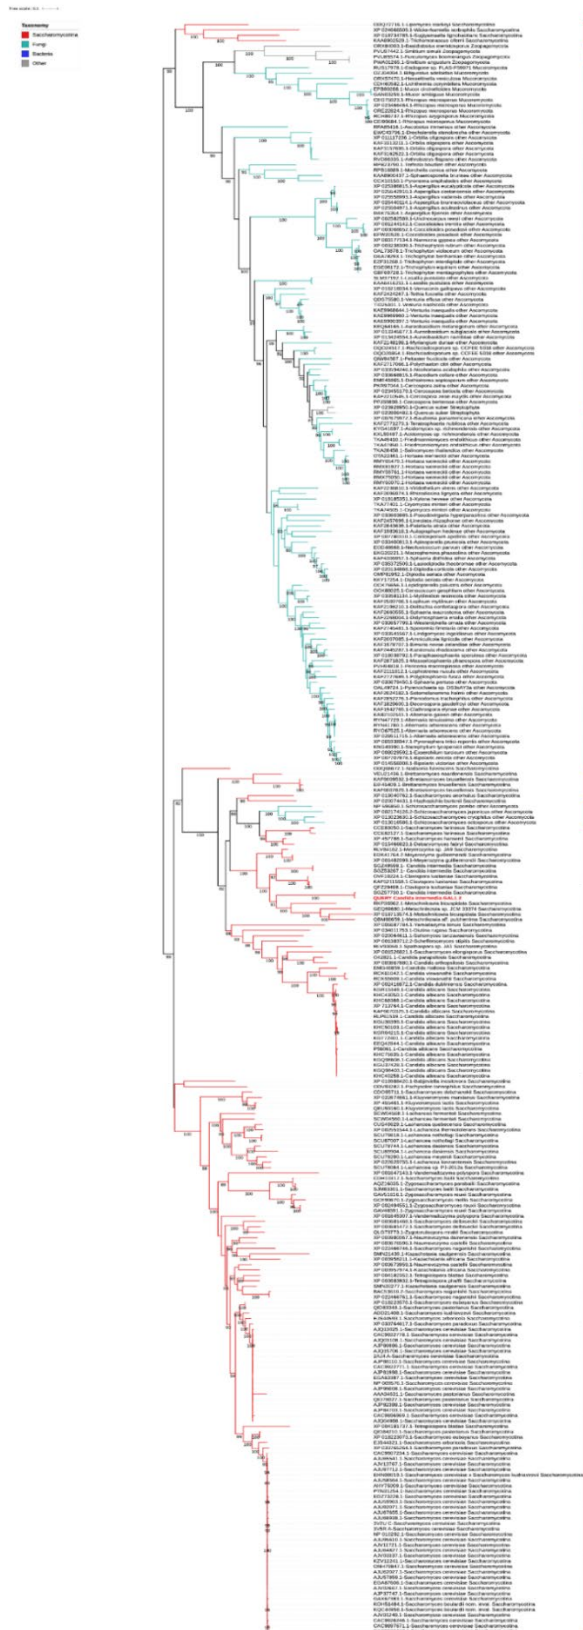

908

909 Figure S 4: Maximum Likelihood phylogenetic tree depicting origin and evolution of the *GAL1\_2* gene  
910 in *C. intermedia*.

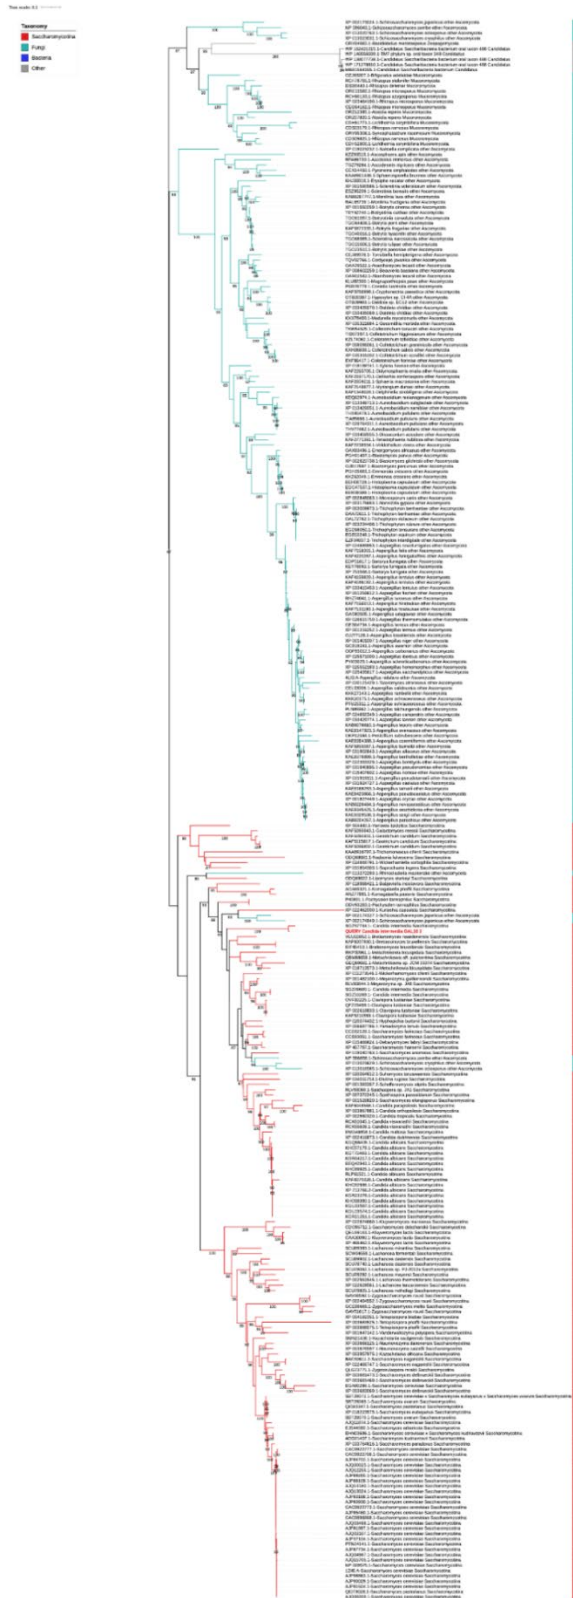

911

912 Figure S 5: Maximum likelihood phylogenetic tree for the origin and evolution of the *GAL10\_2* gene in  
913 *C. intermedia*.



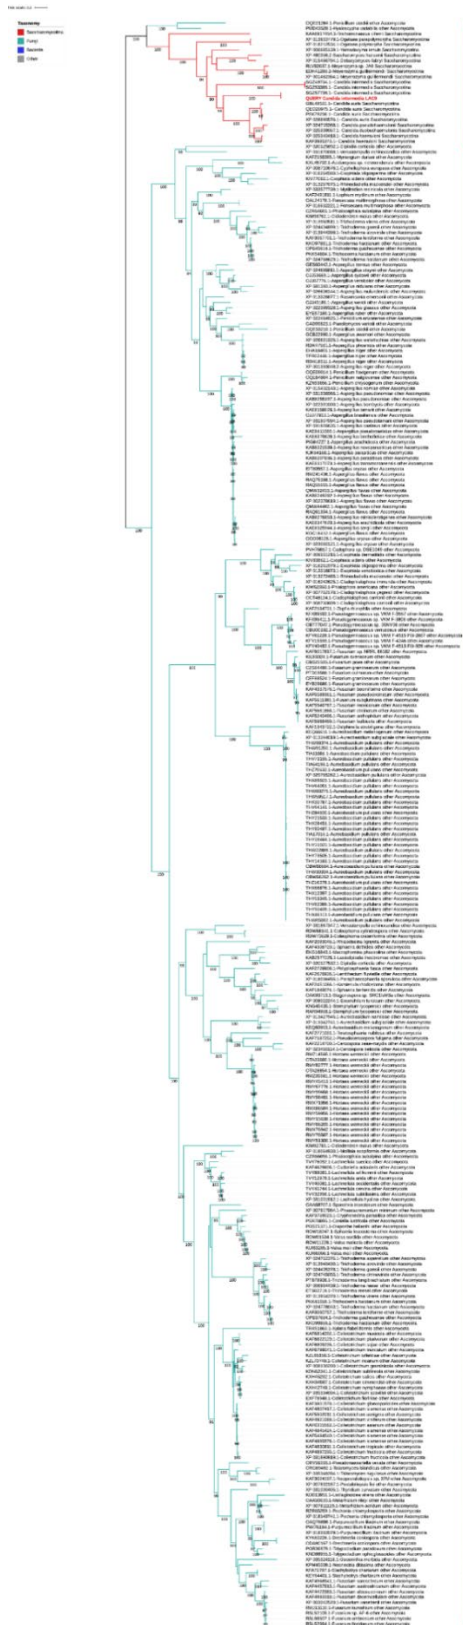

914

915 Figure S 6: Maximum likelihood phylogenetic tree for the origin and evolution of the *LAC9* gene in *C.*  
916 *intermedia*.

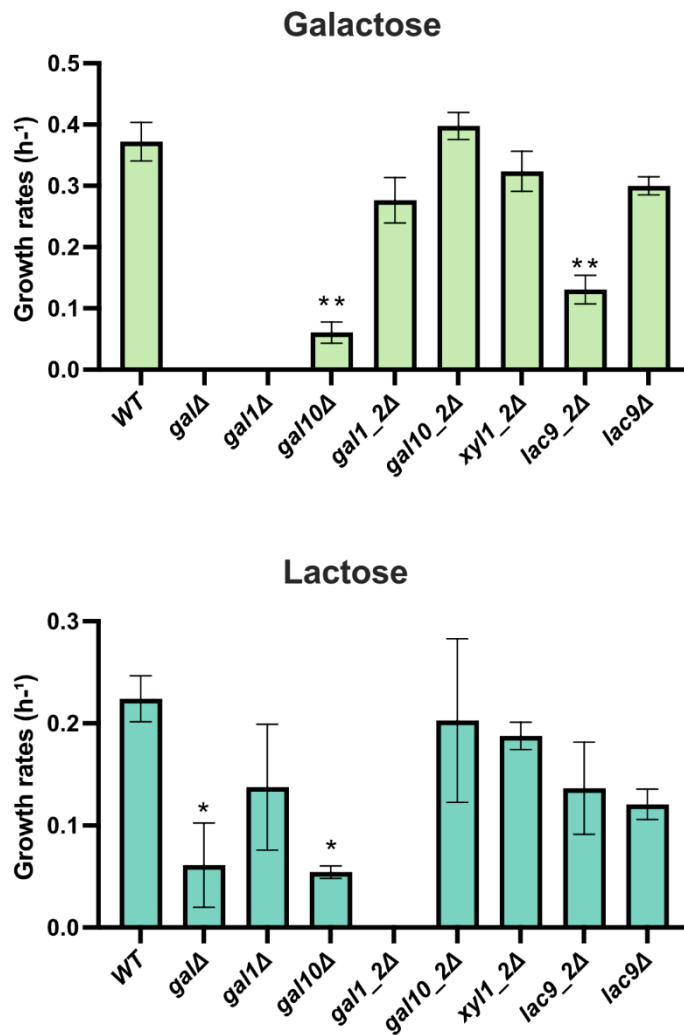

917

918 Figure S 7: Bar plot with growth rates of different mutants in comparison to the wild-type strain (WT)  
919 on galactose as well as lactose. Significance difference in growth rates compared to the WT strain have  
920 been estimated using students t-test and values with  $p > 0.01$  are considered significantly different. Data  
921 are represented as mean  $\pm$  standard deviation for biological triplicates.

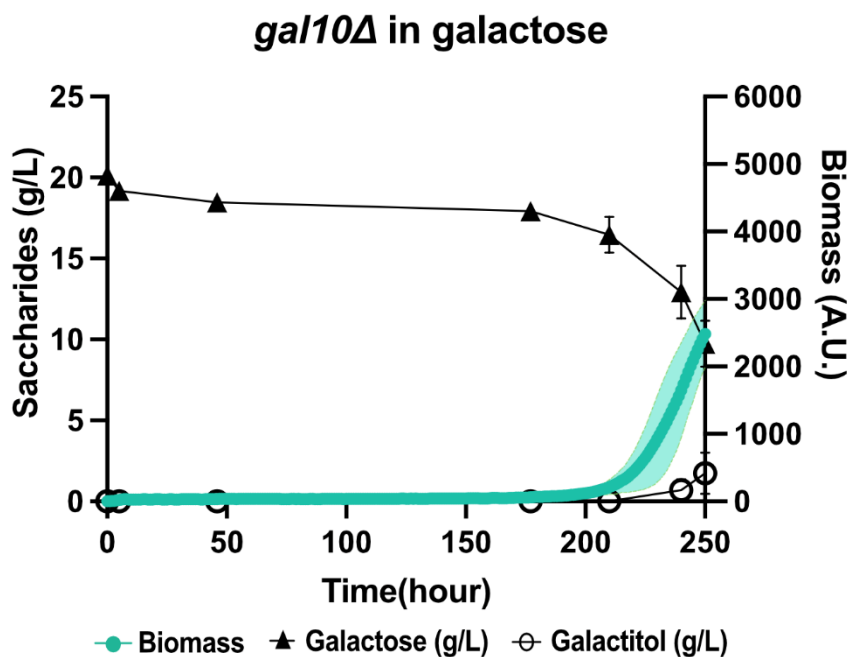

922

923 Figure S 8: Growth and metabolite profile for gal10Δ in galactose containing minimal media. Graph  
924 represents biomass (filled green circle) on the right y-axis, consumption of respective sugars (filled  
925 triangle for galactose in g/L) and metabolite production (open circle for galactitol in g/L) on the left y-  
926 axis, plotted against time (in hours) on x axis. Data are represented as mean ± standard deviation for  
927 biological triplicates.

928

929

930

931

932

933

934

935

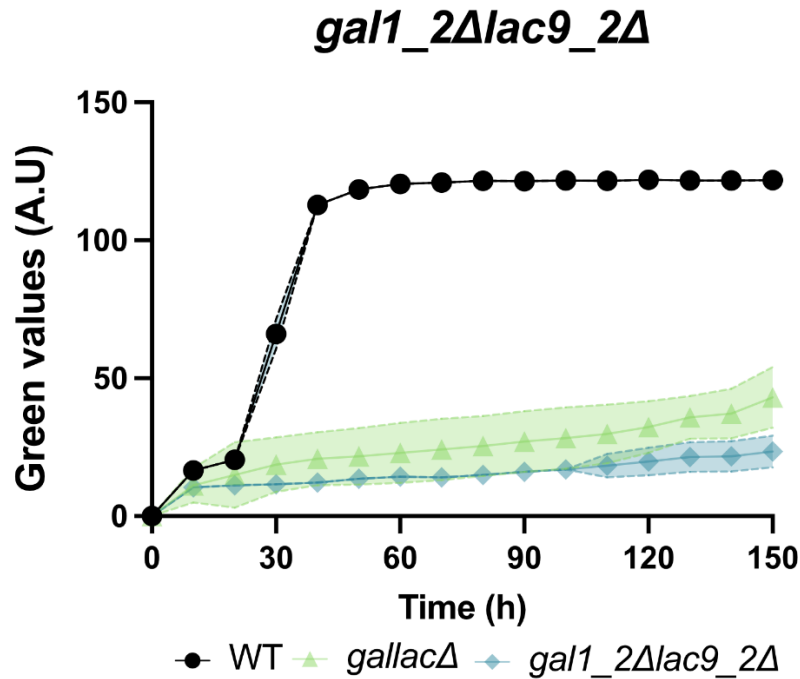

936

937 Figure S 9: Growth profile for the double deletion mutant *gal1\_2Δlac9Δ* in comparison with WT and  
938 *gallacΔ* in galactose. Legend shows the wild-type strain (black circle), *GALLAC* cluster deletion mutant  
939 *gal1\_2Δlac9Δ* depicted in the graph with growth as green values (A.U.) on the y-  
940 axis against time(hours) on the x-axis. Data are represented as mean ± standard deviation for biological  
941 triplicates indicated by colors: wild type – yellow, lac cluster mutant – purple, gallac cluster deletion –  
942 dark green and gal cluster mutant – light green.

943

944

945

946

947

948

949

950

951

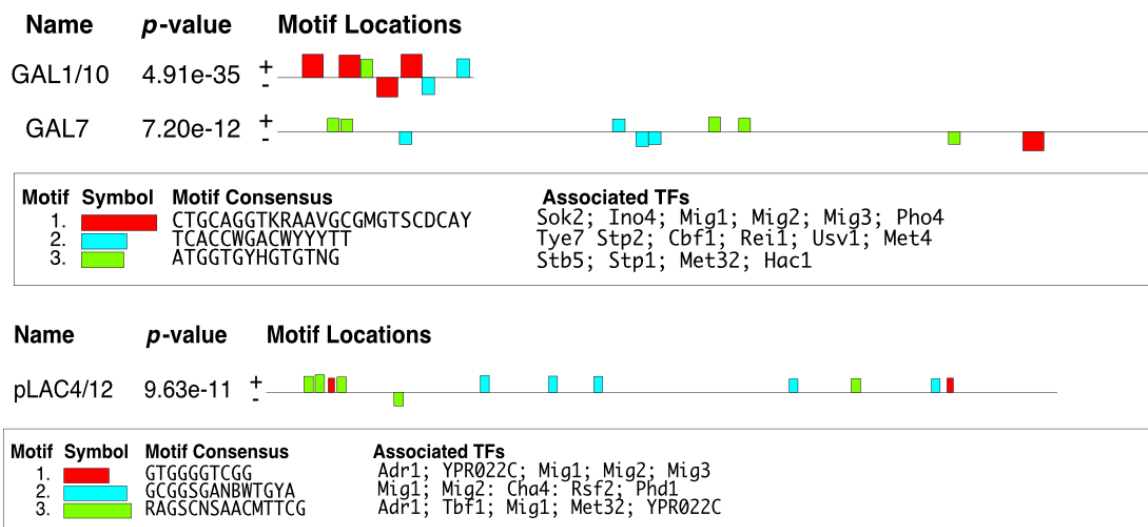

952

953 Figure S 10: Results of transcription factor binding analysis performed using MEME (version 5.5.2) on  
 954 promoter regions of genes in the *GAL* and *LAC* clusters. Results show the predicted binding motifs of  
 955 TFs in the promoter regions ranked based on p-value for the motif. Also mentioned are the predicted  
 956 transcription factors that are associated to the binding motifs.

957

958

959

960

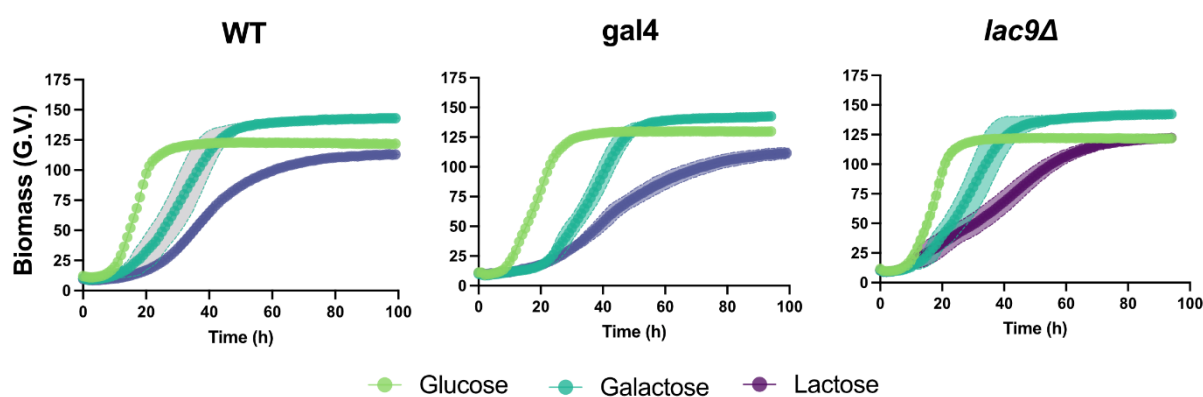

961

962 Figure S 11: Growth profiles for WT, *gal4* and *lac9* mutants in glucose (light green), galactose (dark  
 963 green) and lactose (purple) containing media. Time (in hours) on x-axis is plotted against biomass yield  
 964 (green values – G.V.) on y-axis. Data are represented as mean  $\pm$  standard deviation for biological  
 965 triplicates.

966

967

| primer name | sequence             | gene target | orientation |
|-------------|----------------------|-------------|-------------|
| GTB396      | ATCCTGGTCCTCAATGCACA | lac4        | fwd         |
| GTB397      | CTGGAATCTCGAGGTCTCCC | lac4        | rev         |
| GTB351      | ACCTCCAAGCACTCGGAAAG | GAL1        | fwd         |
| GTB352      | ACGATAGACCCGCCAAATCC | GAL1        | rev         |
| GTB357      | TGACCGAGGCTCCAATGAAC | ACT1        | fwd         |
| GTB358      | CACCGTCACCAGAGTCCAAA | ACT1        | rev         |

968 Table S 1: Primers used for mRNA quantification using qPCR in *C. intermedia*. Primers were designed  
969 using Primer3 (<https://primer3.ut.ee/>) and primer pairs were checked for efficiency prior to use.
